# Supplementary material for: Exploring the Instrumental and Emotional Supports for Sustainability and Social Participation
Source: MDPI journal article supplement (doi:10.3390/su141610377), 2022-08-20
Supplement: s1 [file s1]

**Table S1-1.** Association between the ability to manage emotions (Identify what you feel) and the sociodemographic characteristics of the participants.

| Identify what you feel        |                                                                        | Frequency N (%)        |                           |               | $\chi^2$ | <i>p</i> |
|-------------------------------|------------------------------------------------------------------------|------------------------|---------------------------|---------------|----------|----------|
|                               |                                                                        | Never/<br>Almost never | Sometimes/<br>Quite often | Often/ Always |          |          |
| <b>Age (years)</b>            |                                                                        |                        |                           |               |          |          |
|                               | < 22                                                                   | 13 (6.0)               | 118 (54.6)                | 85 (39.4)     | 25.782   | <.000    |
|                               | 22-39                                                                  | 11 (2.7)               | 211 (54.6)                | 187 (39.4)    |          |          |
|                               | ≥ 40                                                                   | 3 (0.9)                | 136 (42.2)                | 183 (56.8)    |          |          |
| <b>Gender</b>                 |                                                                        |                        |                           |               |          |          |
|                               | Male                                                                   | 10 (3.3)               | 151 (49.5)                | 144 (47.2)    | .386     | .825     |
|                               | Female                                                                 | 17 (2.6)               | 314 (48.8)                | 312 (48.5)    |          |          |
| <b>Place of origin</b>        |                                                                        |                        |                           |               |          |          |
|                               | Rural area                                                             | 11 (3.2)               | 202 (58.6)                | 132 (38.3)    | 21.119   | <.000    |
|                               | Urban area                                                             | 16 (2.7)               | 263 (43.6)                | 324 (53.7)    |          |          |
| <b>Education</b>              |                                                                        |                        |                           |               |          |          |
|                               | Less than college or university                                        | 6 (4.6)                | 76 (58.6)                 | 48 (36.9)     | 8.286    | .016     |
|                               | College or university                                                  | 21 (2.6)               | 389 (47.6)                | 408 (49.9)    |          |          |
| <b>Autonomy level</b>         |                                                                        |                        |                           |               |          |          |
|                               | Alone                                                                  | 19 (2.3)               | 398 (48.8)                | 399 (48.8)    | 6.419    | .040     |
|                               | Family/profesional/other support                                       | 8 (6.1)                | 67 (50.8)                 | 57 (43.2)     |          |          |
| <b>Marital status</b>         |                                                                        |                        |                           |               |          |          |
|                               | Single                                                                 | 22 (4.7)               | 242 (52.2)                | 200 (43.1)    | 21.855   | <.000    |
|                               | Married or in union                                                    | 4 (1.0)                | 170 (42.9)                | 213 (55.0)    |          |          |
|                               | Widowed/separated/divorced                                             | 0 (.0)                 | 15 (39.5)                 | 23 (60.5)     |          |          |
| <b>Living arrangements</b>    |                                                                        |                        |                           |               |          |          |
|                               | Living alone/with children/with grandchildren                          | 1 (.9)                 | 58 (52.7)                 | 51 (46.4)     | 19.537   | .003     |
|                               | Living with a partner/with a partner and children and/or grandchildren | 5 (1.4)                | 152 (42.8)                | 198 (55.8)    |          |          |
|                               | Living with parents and/or grandparents/with other relatives           | 13 (4.3)               | 159 (52.6)                | 130 (43.0)    |          |          |
|                               | Living with friends/other types                                        | 8 (4.4)                | 96 (53.0)                 | 77 (42.5)     |          |          |
| <b>Employment situation</b>   |                                                                        |                        |                           |               |          |          |
|                               | Unemployed/retired                                                     | 18 (3.6)               | 275 (54.5)                | 212 (42.0)    | 16.800   | <.000    |
|                               | Employed                                                               | 9 (2.0)                | 190 (42.9)                | 244 (55.1)    |          |          |
| <b>Income level (€/month)</b> |                                                                        |                        |                           |               |          |          |
|                               | > 2001                                                                 | 21 (3.9)               | 294 (54.2)                | 227 (41.9)    | 28.423   | <.000    |
|                               | 1001-2000                                                              | 5 (2.1)                | 113 (46.7)                | 124 (51.2)    |          |          |
|                               | < 1000                                                                 | 1 (.6)                 | 58 (35.4)                 | 105 (64.0)    |          |          |

NOTE: N=Number of participants,  $\chi^2$ =Chi-square test, *p*=significance,  $\alpha$ -Risk=.05

**Table S1-2.** Association between the ability to manage emotions (Recognize what others feel) and the sociodemographic characteristics of the participants.

| Recognize what others feel |                                                                        | Frequency N (%)        |                           |               | $\chi^2$ | <i>p</i> |
|----------------------------|------------------------------------------------------------------------|------------------------|---------------------------|---------------|----------|----------|
|                            |                                                                        | Never/<br>Almost never | Sometimes/<br>Quite often | Often/ Always |          |          |
| Age (years)                |                                                                        |                        |                           |               |          |          |
|                            | < 22                                                                   | 12 (5.6)               | 145 (67.1)                | 59 (27.3)     | 7.963    | .093     |
|                            | 22-39                                                                  | 19 (4.6)               | 265 (64.8)                | 125 (30.6)    |          |          |
|                            | ≥ 40                                                                   | 6 (1.9)                | 205 (63.7)                | 111 (34.5)    |          |          |
| Gender                     |                                                                        |                        |                           |               |          |          |
|                            | Male                                                                   | 15 (4.9)               | 209 (68.5)                | 81 (26.6)     | 5.247    | .076     |
|                            | Female                                                                 | 22 (59.9)              | 406 (66.0)                | 215 (72.6)    |          |          |
| Place of origin            |                                                                        |                        |                           |               |          |          |
|                            | Rural area                                                             | 17 (4.9)               | 245 (71.0)                | 83 (24.1)     | 13.531   | .001     |
|                            | Urban area                                                             | 20 (3.3)               | 370 (61.4)                | 213 (35.3)    |          |          |
| Education                  |                                                                        |                        |                           |               |          |          |
|                            | Less than college or university                                        | 7 (5.4)                | 95 (73.1)                 | 28 (21.5)     | 6.936    | .031     |
|                            | College or university                                                  | 30 (3.7)               | 520 (63.6)                | 268 (32.8)    |          |          |
| Autonomy level             |                                                                        |                        |                           |               |          |          |
|                            | Alone                                                                  | 28 (3.4)               | 528 (64.7)                | 260 (31.9)    | 4.131    | .127     |
|                            | Family/profesional/other support                                       | 9 (6.8)                | 87 (65.9)                 | 36 (27.3)     |          |          |
| Marital status             |                                                                        |                        |                           |               |          |          |
|                            | Single                                                                 | 29 (6.3)               | 310 (66.8)                | 125 (26.9)    | 20.724   | <.001    |
|                            | Married or in union                                                    | 7 (1.8)                | 245 (63.3)                | 135 (34.9)    |          |          |
|                            | Widowed/separated/divorced                                             | 0 (.0)                 | 20 (52.6)                 | 18 (47.4)     |          |          |
| Living arrangements        |                                                                        |                        |                           |               |          |          |
|                            | Living alone/with children/with grandchildren                          | 4 (3.6)                | 75 (68.2)                 | 31 (28.2)     | 6.959    | .325     |
|                            | Living with a partner/with a partner and children and/or grandchildren | 9 (2.5)                | 221 (62.3)                | 125 (35.2)    |          |          |
|                            | Living with parents and/or grandparents/with other relatives           | 16 (5.3)               | 198 (65.6)                | 88 (29.1)     |          |          |
|                            | Living with friends/other types                                        | 8 (4.4)                | 121 (66.9)                | 52 (28.7)     |          |          |
| Employment situation       |                                                                        |                        |                           |               |          |          |
|                            | Unemployed/retired                                                     | 21 (4.2)               | 341 (67.5)                | 143 (28.3)    | 4.276    | .118     |
|                            | Employed                                                               | 16 (3.6)               | 274 (61.9)                | 153 (34.5)    |          |          |
| Income level (€/month)     |                                                                        |                        |                           |               |          |          |
|                            | > 2001                                                                 | 27 (5.0)               | 363 (67.0)                | 152 (28.0)    | 16.707   | .002     |
|                            | 1001-2000                                                              | 6 (2.5)                | 163 (67.4)                | 73 (30.4)     |          |          |
|                            | < 1000                                                                 | 4 (2.4)                | 89 (54.3)                 | 71 (43.3)     |          |          |

NOTE: N=Number of participants,  $\chi^2$ =Chi-square test, *p*=significance,  $\alpha$ -Risk=.05

**Table S1-3.** Association between the ability to manage emotions (Express your feelings openly) and the sociodemographic characteristics of the participants.

| Express your feelings openly |                                                                        | Frequency N (%)        |                           |               | $\chi^2$ | <i>p</i> |
|------------------------------|------------------------------------------------------------------------|------------------------|---------------------------|---------------|----------|----------|
|                              |                                                                        | Never/<br>Almost never | Sometimes/<br>Quite often | Often/ Always |          |          |
| Age (years)                  |                                                                        |                        |                           |               |          |          |
|                              | < 22                                                                   | 55 (25.5)              | 122 (56.6)                | 39 (18.1)     | 27.687   | <.001    |
|                              | 22-39                                                                  | 89 (21.8)              | 223 (54.5)                | 97 (23.7)     |          |          |
|                              | ≥ 40                                                                   | 32 (9.9)               | 201 (62.4)                | 89 (27.6)     |          |          |
| Gender                       |                                                                        |                        |                           |               |          |          |
|                              | Male                                                                   | 60 (19.7)              | 192 (63.0)                | 53 (17.4)     | 10.414   | .005     |
|                              | Female                                                                 | 116 (18.0)             | 354 (55.1)                | 173 (26.9)    |          |          |
| Place of origin              |                                                                        |                        |                           |               |          |          |
|                              | Rural area                                                             | 73 (21.2)              | 198 (57.4)                | 74 (21.4)     | 3.270    | .195     |
|                              | Urban area                                                             | 103 (17.1)             | 348 (57.7)                | 152 (25.2)    |          |          |
| Education                    |                                                                        |                        |                           |               |          |          |
|                              | Less than college or university                                        | 29 (22.3)              | 75 (57.7)                 | 26 (20.0)     | 2.068    | .355     |
|                              | College or university                                                  | 147 (18.0)             | 471 (57.6)                | 200 (24.4)    |          |          |
| Autonomy level               |                                                                        |                        |                           |               |          |          |
|                              | Alone                                                                  | 151 (18.5)             | 466 (57.1)                | 199 (24.4)    | .990     | .610     |
|                              | Family/profesional/other support                                       | 25 (18.9)              | 80 (60.6)                 | 27 (20.5)     |          |          |
| Marital status               |                                                                        |                        |                           |               |          |          |
|                              | Single                                                                 | 117 (25.2)             | 243 (52.4)                | 104 (22.4)    | 30.971   | <.001    |
|                              | Married or in union                                                    | 41 (10.6)              | 245 (63.3)                | 101 (26.1)    |          |          |
|                              | Widowed/separated/divorced                                             | 5 (13.2)               | 24 (63.2)                 | 9 (23.7)      |          |          |
| Living arrangements          |                                                                        |                        |                           |               |          |          |
|                              | Living alone/with children/with grandchildren                          | 8 (21.8)               | 121 (54.5)                | 52 (23.6)     | 34.580   | <.001    |
|                              | Living with a partner/with a partner and children and/or grandchildren | 33 (9.3)               | 221 (62.3)                | 101 (28.5)    |          |          |
|                              | Living with parents and/or grandparents/with other relatives           | 72 (23.8)              | 168 (55.6)                | 62 (20.5)     |          |          |
|                              | Living with friends/other types                                        | 47 (26.0)              | 97 (53.6)                 | 37 (20.4)     |          |          |
| Employment situation         |                                                                        |                        |                           |               |          |          |
|                              | Unemployed/retired                                                     | 108 (21.4)             | 283 (56.0)                | 114 (22.6)    | 5.811    | .055     |
|                              | Employed                                                               | 68 (15.3)              | 263 (59.4)                | 112 (25.3)    |          |          |
| Income level (€/month)       |                                                                        |                        |                           |               |          |          |
|                              | > 2001                                                                 | 126 (23.2)             | 304 (56.1)                | 112 (20.7)    | 21.294   | <.001    |
|                              | 1001-2000                                                              | 32 (13.2)              | 141 (58.3)                | 69 (28.5)     |          |          |
|                              | < 1000                                                                 | 18 (11.0)              | 101 (61.6)                | 45 (27.4)     |          |          |

NOTE: N=Number of participants,  $\chi^2$ =Chi-square test, *p*=significance,  $\alpha$ -Risk=.05

**Table S1-4.** Association between the ability to manage emotions (Control your own emotions) and the sociodemographic characteristics of the participants.

| Control your own emotions |                                                                        | Frequency N (%)        |                           |               | $\chi^2$ | <i>p</i> |
|---------------------------|------------------------------------------------------------------------|------------------------|---------------------------|---------------|----------|----------|
|                           |                                                                        | Never/<br>Almost never | Sometimes/<br>Quite often | Often/ Always |          |          |
| Age (years)               |                                                                        |                        |                           |               |          |          |
|                           | < 22                                                                   | 47 (21.8)              | 133 (61.6)                | 36 (16.7)     | 14.845   | .005     |
|                           | 22-39                                                                  | 66 (16.1)              | 249 (60.9)                | 94 (23.0)     |          |          |
|                           | ≥ 40                                                                   | 34 (10.6)              | 218 (67.7)                | 70 (21.7)     |          |          |
| Gender                    |                                                                        |                        |                           |               |          |          |
|                           | Male                                                                   | 35 (11.5)              | 183 (60.0)                | 87 (28.5)     | 16.852   | <.001    |
|                           | Female                                                                 | 112 (17.4)             | 417 (64.9)                | 114 (17.7)    |          |          |
| Place of origin           |                                                                        |                        |                           |               |          |          |
|                           | Rural area                                                             | 52 (15.1)              | 221 (64.1)                | 72 (20.9)     | .145     | .930     |
|                           | Urban area                                                             | 95 (15.8)              | 379 (62.9)                | 129 (21.4)    |          |          |
| Education                 |                                                                        |                        |                           |               |          |          |
|                           | Less than college or university                                        | 23 (17.7)              | 90 (69.2)                 | 17 (13.1)     | 5.996    | .050     |
|                           | College or university                                                  | 124 (15.2)             | 510 (62.3)                | 184 (22.5)    |          |          |
| Autonomy level            |                                                                        |                        |                           |               |          |          |
|                           | Alone                                                                  | 119 (14.6)             | 518 (63.5)                | 179 (21.9)    | 4.741    | .093     |
|                           | Family/profesional/other support                                       | 28 (21.2)              | 82 (62.1)                 | 22 (16.7)     |          |          |
| Marital status            |                                                                        |                        |                           |               |          |          |
|                           | Single                                                                 | 83 (17.9)              | 283 (61.0)                | 98 (21.1)     | 11.644   | .020     |
|                           | Married or in union                                                    | 49 (12.7)              | 254 (65.6)                | 84 (21.7)     |          |          |
|                           | Widowed/separated/divorced                                             | 3 (7.9)                | 32 (84.2)                 | 3 (7.9)       |          |          |
| Living arrangements       |                                                                        |                        |                           |               |          |          |
|                           | Living alone/with children/with grandchildren                          | 17 (15.5)              | 79 (71.8)                 | 14 (12.7)     | 14.102   | .029     |
|                           | Living with a partner/with a partner and children and/or grandchildren | 41 (11.5)              | 235 (66.2)                | 79 (22.3)     |          |          |
|                           | Living with parents and/or grandparents/with other relatives           | 55 (18.2)              | 176 (58.3)                | 71 (23.5)     |          |          |
|                           | Living with friends/other types                                        | 34 (18.8)              | 110 (60.8)                | 37 (20.4)     |          |          |
| Employment situation      |                                                                        |                        |                           |               |          |          |
|                           | Unemployed/retired                                                     | 94 (18.6)              | 313 (62.0)                | 98 (19.4)     | 8.669    | .013     |
|                           | Employed                                                               | 53 (12.0)              | 287 (64.8)                | 103 (23.3)    |          |          |
| Income level (€/month)    |                                                                        |                        |                           |               |          |          |
|                           | > 2001                                                                 | 101 (18.6)             | 337 (62.2)                | 104 (19.2)    | 13.842   | .008     |
|                           | 1001-2000                                                              | 33 (13.6)              | 156 (64.5)                | 53 (21.9)     |          |          |
|                           | < 1000                                                                 | 13 (13.6)              | 107 (65.2)                | 44 (26.8)     |          |          |

NOTE: N=Number of participants,  $\chi^2$ =Chi-square test, *p*=significance,  $\alpha$ -Risk=.05

**Table S1-5.** Association between the ability to manage emotions (Empathize with another person) and the sociodemographic characteristics of the participants.

| Empathize with another person |                                                                        | Frequency N (%)        |                           |               | $\chi^2$ | <i>p</i> |
|-------------------------------|------------------------------------------------------------------------|------------------------|---------------------------|---------------|----------|----------|
|                               |                                                                        | Never/<br>Almost never | Sometimes/<br>Quite often | Often/ Always |          |          |
| Age (years)                   |                                                                        |                        |                           |               |          |          |
|                               | < 22                                                                   | 6 (2.8)                | 75 (34.7)                 | 135 (62.5)    | 9.527    | .049     |
|                               | 22-39                                                                  | 10 (2.4)               | 162 (39.6)                | 237 (57.9)    |          |          |
|                               | ≥ 40                                                                   | 4 (1.2)                | 151 (46.9)                | 167 (51.9)    |          |          |
| Gender                        |                                                                        |                        |                           |               |          |          |
|                               | Male                                                                   | 10 (3.3)               | 154 (50.5)                | 141 (46.2)    | 22.055   | <.001    |
|                               | Female                                                                 | 10 (1.6)               | 234 (36.4)                | 399 (62.1)    |          |          |
| Place of origin               |                                                                        |                        |                           |               |          |          |
|                               | Rural area                                                             | 7 (2.0)                | 148 (42.9)                | 190 (55.1)    | .871     | .647     |
|                               | Urban area                                                             | 13 (2.2)               | 240 (39.8)                | 350 (58.0)    |          |          |
| Education                     |                                                                        |                        |                           |               |          |          |
|                               | Less than college or university                                        | 5 (3.8)                | 56 (43.1)                 | 69 (53.1)     | 2.722    | .256     |
|                               | College or university                                                  | 15 (1.8)               | 332 (40.6)                | 471 (57.6)    |          |          |
| Autonomy level                |                                                                        |                        |                           |               |          |          |
|                               | Alone                                                                  | 15 (1.8)               | 336 (41.2)                | 465 (57.0)    | 2.136    | .344     |
|                               | Family/profesional/other support                                       | 5 (3.8)                | 52 (39.4)                 | 75 (56.8)     |          |          |
| Marital status                |                                                                        |                        |                           |               |          |          |
|                               | Single                                                                 | 16 (3.4)               | 194 (41.8)                | 254 (54.7)    | 7.783    | .100     |
|                               | Married or in union                                                    | 4 (1.0)                | 154 (39.8)                | 229 (59.2)    |          |          |
|                               | Widowed/separated/divorced                                             | 0 (.0)                 | 18 (47.4)                 | 20 (52.6)     |          |          |
| Living arrangements           |                                                                        |                        |                           |               |          |          |
|                               | Living alone/with children/with grandchildren                          | 2 (1.8)                | 51 (46.4)                 | 57 (51.8)     | 5.001    | .544     |
|                               | Living with a partner/with a partner and children and/or grandchildren | 6 (1.7)                | 153 (43.1)                | 196 (55.2)    |          |          |
|                               | Living with parents and/or grandparents/with other relatives           | 8 (2.6)                | 110 (36.4)                | 184 (60.9)    |          |          |
|                               | Living with friends/other types                                        | 4 (2.2)                | 74 (40.9)                 | 103 (56.9)    |          |          |
| Employment situation          |                                                                        |                        |                           |               |          |          |
|                               | Unemployed/retired                                                     | 10 (2.0)               | 204 (40.4)                | 291 (57.6)    | .244     | .885     |
|                               | Employed                                                               | 10 (2.3)               | 184 (41.5)                | 249 (56.2)    |          |          |
| Income level (€/month)        |                                                                        |                        |                           |               |          |          |
|                               | > 2001                                                                 | 15 (2.8)               | 209 (38.6)                | 318 (58.7)    | 5.609    | .230     |
|                               | 1001-2000                                                              | 2 (.8)                 | 109 (45.0)                | 131 (54.1)    |          |          |
|                               | < 1000                                                                 | 3 (1.8)                | 70 (42.7)                 | 91 (55.5)     |          |          |

NOTE: N=Number of participants,  $\chi^2$ =Chi-square test, *p*=significance,  $\alpha$ -Risk=.05

**Table S1-6.** Association between the ability to manage emotions (Know how to say "no" when necessary) and the sociodemographic characteristics of the participants.

| Know how to say "no" when necessary |                                                                        | Frequency N (%)        |                           |               | $\chi^2$ | <i>p</i> |
|-------------------------------------|------------------------------------------------------------------------|------------------------|---------------------------|---------------|----------|----------|
|                                     |                                                                        | Never/<br>Almost never | Sometimes/<br>Quite often | Often/ Always |          |          |
| Age (years)                         |                                                                        |                        |                           |               |          |          |
|                                     | < 22                                                                   | 22 (10.2)              | 111 (51.4)                | 83 (38.4)     | 16.905   | .002     |
|                                     | 22-39                                                                  | 48 (11.7)              | 193 (47.2)                | 168 (41.1)    |          |          |
|                                     | ≥ 40                                                                   | 30 (9.3)               | 200 (62.1)                | 92 (28.6)     |          |          |
| Gender                              |                                                                        |                        |                           |               |          |          |
|                                     | Male                                                                   | 32 (10.5)              | 169 (55.4)                | 104 (34.1)    | 1.021    | .600     |
|                                     | Female                                                                 | 68 (10.6)              | 335 (52.1)                | 240 (37.3)    |          |          |
| Place of origin                     |                                                                        |                        |                           |               |          |          |
|                                     | Rural area                                                             | 29 (8.4)               | 193 (55.9)                | 123 (35.7)    | 3.208    | .201     |
|                                     | Urban area                                                             | 71 (11.8)              | 311 (51.6)                | 221 (36.7)    |          |          |
| Education                           |                                                                        |                        |                           |               |          |          |
|                                     | Less than college or university                                        | 12 (9.2)               | 72 (55.4)                 | 46 (35.4)     | .421     | .810     |
|                                     | College or university                                                  | 88 (10.8)              | 432 (52.8)                | 298 (36.4)    |          |          |
| Autonomy level                      |                                                                        |                        |                           |               |          |          |
|                                     | Alone                                                                  | 86 (10.5)              | 434 (53.2)                | 296 (36.3)    | .001     | .999     |
|                                     | Family/profesional/other support                                       | 14 (10.6)              | 70 (53.0)                 | 48 (36.4)     |          |          |
| Marital status                      |                                                                        |                        |                           |               |          |          |
|                                     | Single                                                                 | 55 (11.9)              | 227 (48.9)                | 182 (39.2)    | 6.328    | .176     |
|                                     | Married or in union                                                    | 38 (9.8)               | 220 (56.8)                | 129 (33.3)    |          |          |
|                                     | Widowed/separated/divorced                                             | 3 (7.9)                | 23 (60.5)                 | 12 (31.6)     |          |          |
| Living arrangements                 |                                                                        |                        |                           |               |          |          |
|                                     | Living alone/with children/with grandchildren                          | 12 (10.9)              | 65 (59.1)                 | 33 (30.0)     | 6.715    | .348     |
|                                     | Living with a partner/with a partner and children and/or grandchildren | 36 (10.1)              | 195 (54.9)                | 124 (34.9)    |          |          |
|                                     | Living with parents and/or grandparents/with other relatives           | 38 (12.6)              | 148 (49.0)                | 116 (38.4)    |          |          |
|                                     | Living with friends/other types                                        | 14 (7.7)               | 96 (49.0)                 | 71 (38.4)     |          |          |
| Employment situation                |                                                                        |                        |                           |               |          |          |
|                                     | Unemployed/retired                                                     | 52 (10.3)              | 265 (52.5)                | 188 (37.2)    | .425     | .809     |
|                                     | Employed                                                               | 48 (10.8)              | 239 (54.0)                | 156 (35.2)    |          |          |
| Income level (€/month)              |                                                                        |                        |                           |               |          |          |
|                                     | > 2001                                                                 | 57 (10.5)              | 270 (49.8)                | 215 (39.7)    | 8.478    | .076     |
|                                     | 1001-2000                                                              | 29 (12.0)              | 141 (58.3)                | 72 (29.8)     |          |          |
|                                     | < 1000                                                                 | 14 (8.5)               | 93 (56.7)                 | 57 (34.8)     |          |          |

NOTE: N=Number of participants,  $\chi^2$ =Chi-square test, *p*=significance,  $\alpha$ -Risk=.05

**Table S1-7.** Association between the ability to manage emotions (In general, be satisfied with yourself) and the sociodemographic characteristics of the participants.

| In general, be satisfied with yourself |                                                                        | Frequency N (%)        |                           |               | $\chi^2$ | <i>p</i> |
|----------------------------------------|------------------------------------------------------------------------|------------------------|---------------------------|---------------|----------|----------|
|                                        |                                                                        | Never/<br>Almost never | Sometimes/<br>Quite often | Often/ Always |          |          |
| <b>Age (years)</b>                     |                                                                        |                        |                           |               |          |          |
|                                        | < 22                                                                   | 25 (11.6)              | 98 (45.4)                 | 93 (43.1)     | 13.155   | .011     |
|                                        | 22-39                                                                  | 22 (5.4)               | 188 (46.0)                | 199 (48.7)    |          |          |
|                                        | ≥ 40                                                                   | 19 (5.9)               | 170 (52.8)                | 133 (41.3)    |          |          |
| <b>Gender</b>                          |                                                                        |                        |                           |               |          |          |
|                                        | Male                                                                   | 19 (6.2)               | 145 (47.5)                | 141 (46.2)    | .543     | .762     |
|                                        | Female                                                                 | 47 (7.0)               | 311 (48.1)                | 285 (44.9)    |          |          |
| <b>Place of origin</b>                 |                                                                        |                        |                           |               |          |          |
|                                        | Rural area                                                             | 21 (6.1)               | 176 (51.0)                | 148 (42.9)    | 2.055    | .358     |
|                                        | Urban area                                                             | 45 (7.5)               | 280 (46.4)                | 278 (46.1)    |          |          |
| <b>Education</b>                       |                                                                        |                        |                           |               |          |          |
|                                        | Less than college or university                                        | 16 (12.3)              | 72 (55.4)                 | 42 (32.3)     | 13.193   | .001     |
|                                        | College or university                                                  | 50 (6.1)               | 384 (46.9)                | 384 (46.9)    |          |          |
| <b>Autonomy level</b>                  |                                                                        |                        |                           |               |          |          |
|                                        | Alone                                                                  | 53 (6.5)               | 397 (48.7)                | 366 (44.9)    | 2.214    | .331     |
|                                        | Family/profesional/other support                                       | 13 (9.8)               | 59 (44.7)                 | 60 (45.5)     |          |          |
| <b>Marital status</b>                  |                                                                        |                        |                           |               |          |          |
|                                        | Single                                                                 | 36 (7.8)               | 219 (47.2)                | 209 (45.0)    | 8.742    | .068     |
|                                        | Married or in union                                                    | 26 (6.7)               | 183 (47.3)                | 178 (46.0)    |          |          |
|                                        | Widowed/separated/divorced                                             | 1 (2.6)                | 27 (71.1)                 | 10 (26.3)     |          |          |
| <b>Living arrangements</b>             |                                                                        |                        |                           |               |          |          |
|                                        | Living alone/with children/with grandchildren                          | 2 (1.8)                | 71 (64.5)                 | 37 (33.6)     | 17.355   | .008     |
|                                        | Living with a partner/with a partner and children and/or grandchildren | 22 (6.2)               | 167 (47.0)                | 166 (46.8)    |          |          |
|                                        | Living with parents and/or grandparents/with other relatives           | 26 (8.6)               | 135 (44.7)                | 141 (46.8)    |          |          |
|                                        | Living with friends/other types                                        | 16 (8.8)               | 83 (45.9)                 | 82 (45.3)     |          |          |
| <b>Employment situation</b>            |                                                                        |                        |                           |               |          |          |
|                                        | Unemployed/retired                                                     | 42 (8.3)               | 234 (46.3)                | 229 (45.3)    | 3.589    | .166     |
|                                        | Employed                                                               | 24 (5.4)               | 222 (50.1)                | 197 (44.5)    |          |          |
| <b>Income level (€/month)</b>          |                                                                        |                        |                           |               |          |          |
|                                        | > 2001                                                                 | 46 (8.5)               | 251 (46.3)                | 245 (45.2)    | 12.060   | .017     |
|                                        | 1001-2000                                                              | 9 (3.7)                | 135 (55.8)                | 98 (40.5)     |          |          |
|                                        | < 1000                                                                 | 11 (6.7)               | 70 (42.7)                 | 83 (50.6)     |          |          |

NOTE: N=Number of participants,  $\chi^2$ =Chi-square test, *p*=significance,  $\alpha$ -Risk=.05

**Figure S1.** Association between the motivations (Persist in reaching your goals) and the sociodemographic characteristics of the participants.

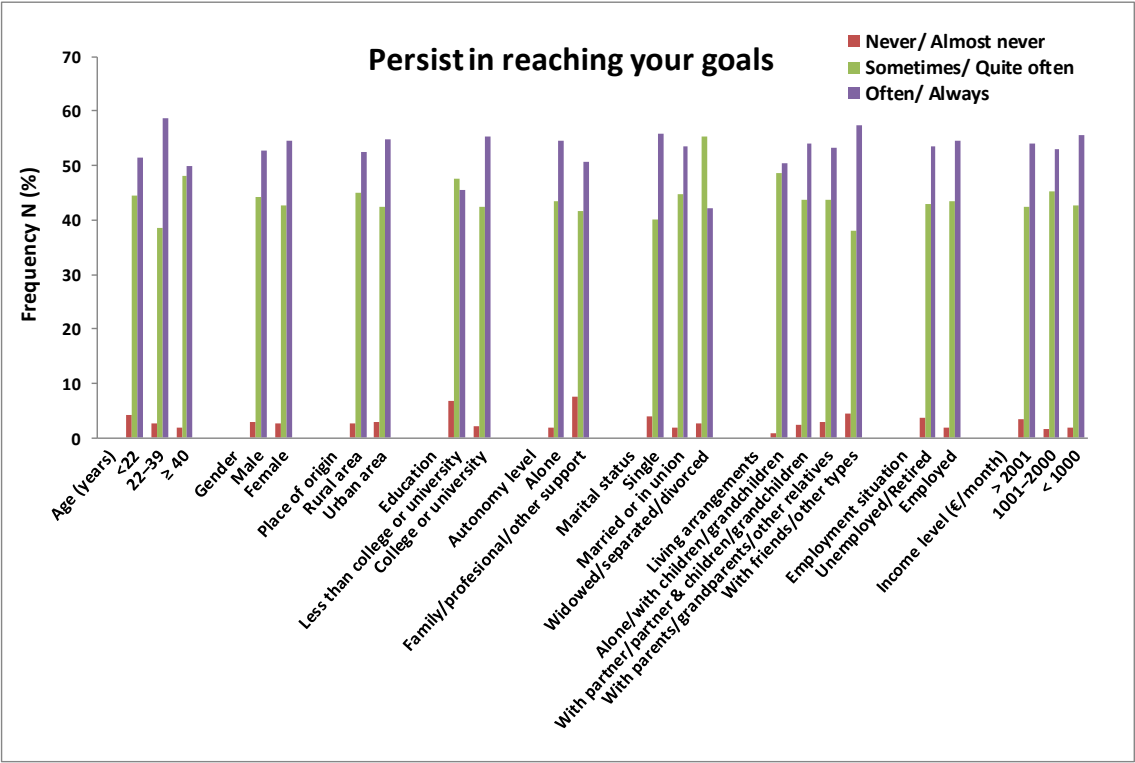



**Figure S2.** Association between the motivations (Do things for the pleasure of doing them) and the sociodemographic characteristics of the participants.

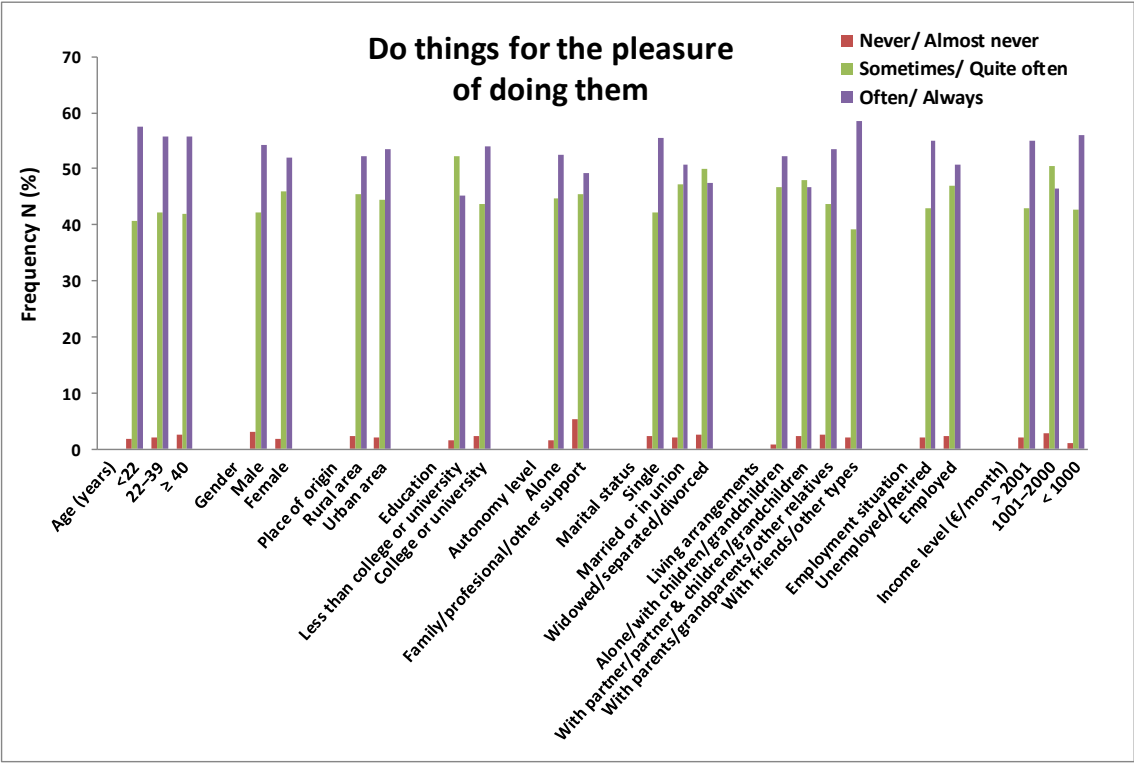

**Figure S3.** Association between the motivations (Do things for the recognition of others) and the sociodemographic characteristics of the participants.

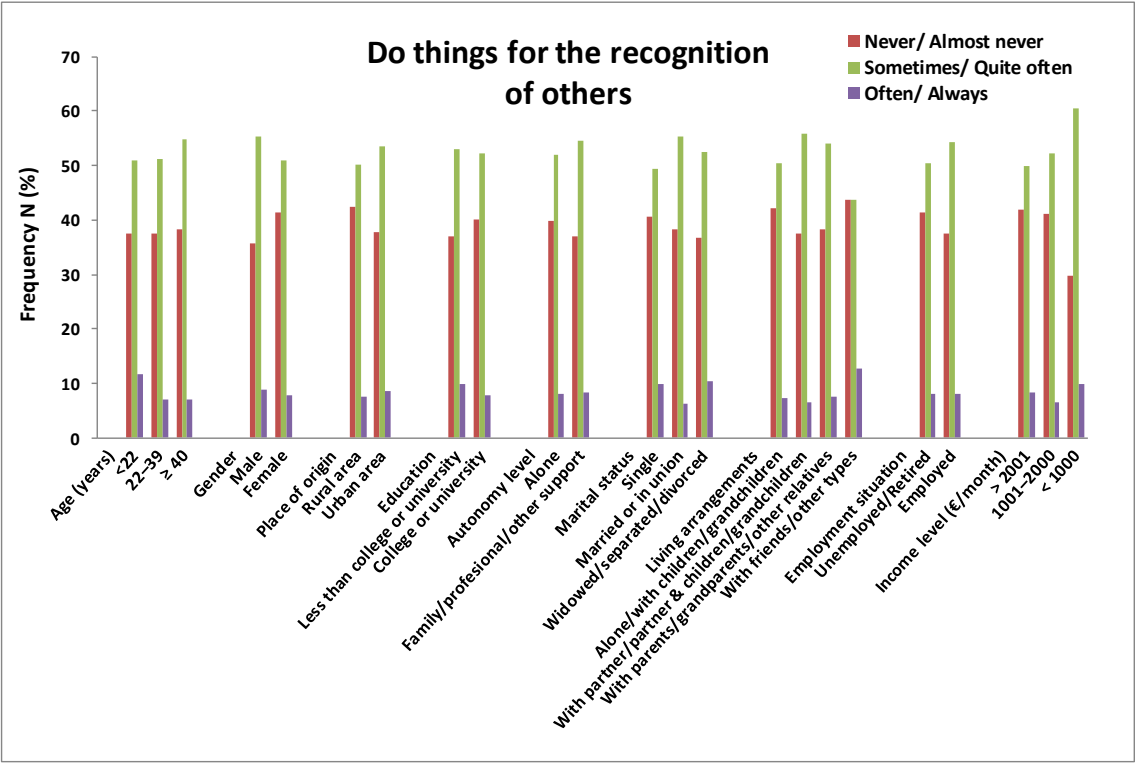

**Table S2-1.** Association between the self-efficacy (Perform personal care activities) and the sociodemographic characteristics of the participants.

| Perform personal care activities                                       |  | Frequency N (%)                    |                                                |                                         | $\chi^2$ | <i>p</i> |
|------------------------------------------------------------------------|--|------------------------------------|------------------------------------------------|-----------------------------------------|----------|----------|
|                                                                        |  | Not be/<br>unsure of<br>being able | Neither<br>unsure nor<br>sure of being<br>able | Quite/ totally<br>sure of being<br>able |          |          |
| Age (years)                                                            |  |                                    |                                                |                                         |          |          |
| < 22                                                                   |  | 5 (2.3)                            | 211 (97.7)                                     | 0 (.0)                                  | 2.990    | .560     |
| 22-39                                                                  |  | 7 (1.7)                            | 399 (98.0)                                     | 1 (.2)                                  |          |          |
| ≥ 40                                                                   |  | 3 (.9)                             | 319 (99.1)                                     | 0 (.0)                                  |          |          |
| Gender                                                                 |  |                                    |                                                |                                         |          |          |
| Male                                                                   |  | 6 (2.0)                            | 298 (97.7)                                     | 1 (.3)                                  | 2.532    | .282     |
| Female                                                                 |  | 9 (1.4)                            | 632 (98.6)                                     | 0 (.0)                                  |          |          |
| Place of origin                                                        |  |                                    |                                                |                                         |          |          |
| Rural area                                                             |  | 5 (1.4)                            | 339 (98.3)                                     | 1 (.3)                                  | 1.806    | .405     |
| Urban area                                                             |  | 10 (1.7)                           | 591 (98.3)                                     | 0 (.0)                                  |          |          |
| Education                                                              |  |                                    |                                                |                                         |          |          |
| Less than college or university                                        |  | 5 (3.8)                            | 125 (96.2)                                     | 0 (.0)                                  | 5.087    | .079     |
| College or university                                                  |  | 10 (1.2)                           | 805 (98.7)                                     | 1 (.1)                                  |          |          |
| Autonomy level                                                         |  |                                    |                                                |                                         |          |          |
| Alone                                                                  |  | 9 (1.1)                            | 804 (98.8)                                     | 1 (.1)                                  | 8.765    | .012     |
| Family/profesional/other support                                       |  | 1 (5.0)                            | 19 (95.0)                                      | 0 (.0)                                  |          |          |
| Marital status                                                         |  |                                    |                                                |                                         |          |          |
| Single                                                                 |  | 10 (2.2)                           | 452 (97.6)                                     | 1 (.2)                                  | 2.556    | .635     |
| Married or in union                                                    |  | 5 (1.3)                            | 381 (98.7)                                     | 0 (.0)                                  |          |          |
| Widowed/separated/divorced                                             |  | 0 (.0)                             | 38 (100.0)                                     | 0 (.0)                                  |          |          |
| Living arrangements                                                    |  |                                    |                                                |                                         |          |          |
| Living alone/with children/with grandchildren                          |  | 1 (.9)                             | 108 (99.1)                                     | 0 (.0)                                  | 2.031    | .917     |
| Living with a partner/with a partner and children and/or grandchildren |  | 6 (1.7)                            | 347 (98.0)                                     | 1 (.3)                                  |          |          |
| Living with parents and/or grandparents/with other relatives           |  | 5 (1.7)                            | 297 (98.3)                                     | 0 (.0)                                  |          |          |
| Living with friends/other types                                        |  | 3 (1.7)                            | 178 (98.3)                                     | 0 (.0)                                  |          |          |
| Employment situation                                                   |  |                                    |                                                |                                         |          |          |
| Unemployed/retired                                                     |  | 8 (1.6)                            | 497 (98.4)                                     | 0 (.0)                                  | 1.146    | .564     |
| Employed                                                               |  | 7 (1.6)                            | 433 (98.2)                                     | 1 (.2)                                  |          |          |
| Income level (€/month)                                                 |  |                                    |                                                |                                         |          |          |
| > 2001                                                                 |  | 9 (1.7)                            | 532 (98.3)                                     | 0 (.0)                                  | 5.041    | .283     |
| 1001-2000                                                              |  | 3 (1.2)                            | 238 (98.8)                                     | 0 (.0)                                  |          |          |
| < 1000                                                                 |  | 3 (1.8)                            | 160 (97.6)                                     | 1 (.6)                                  |          |          |

NOTE: N=Number of participants,  $\chi^2$ =Chi-square test, *p*=significance,  $\alpha$ -Risk=.05

**Table S2-2.** Association between the self-efficacy (Perform physical exercise) and the sociodemographic characteristics of the participants.

| Perform physical exercise |                                                                        | Frequency N (%)                    |                                                |                                         | $\chi^2$ | <i>p</i> |
|---------------------------|------------------------------------------------------------------------|------------------------------------|------------------------------------------------|-----------------------------------------|----------|----------|
|                           |                                                                        | Not be/<br>unsure of<br>being able | Neither<br>unsure nor<br>sure of being<br>able | Quite/ totally<br>sure of being<br>able |          |          |
| Age (years)               |                                                                        |                                    |                                                |                                         |          |          |
|                           | < 22                                                                   | 14 (6.5)                           | 202 (93.5)                                     | 0 (.0)                                  | 2.005    | .735     |
|                           | 22-39                                                                  | 20 (4.9)                           | 386 (94.8)                                     | 1 (.2)                                  |          |          |
|                           | ≥ 40                                                                   | 17 (5.3)                           | 305 (94.7)                                     | 0 (.0)                                  |          |          |
| Gender                    |                                                                        |                                    |                                                |                                         |          |          |
|                           | Male                                                                   | 12 (3.9)                           | 292 (95.7)                                     | 1 (.3)                                  | 4.186    | .123     |
|                           | Female                                                                 | 40 (6.2)                           | 601 (93.8)                                     | 0 (.0)                                  |          |          |
| Place of origin           |                                                                        |                                    |                                                |                                         |          |          |
|                           | Rural area                                                             | 20 (5.8)                           | 324 (93.9)                                     | 1 (.3)                                  | 1.845    | .398     |
|                           | Urban area                                                             | 32 (5.3)                           | 569 (94.7)                                     | 0 (.0)                                  |          |          |
| Education                 |                                                                        |                                    |                                                |                                         |          |          |
|                           | Less than college or university                                        | 10 (7.7)                           | 120 (92.3)                                     | 0 (.0)                                  | 1.551    | .461     |
|                           | College or university                                                  | 42 (5.1)                           | 773 (94.7)                                     | 1 (.1)                                  |          |          |
| Autonomy level            |                                                                        |                                    |                                                |                                         |          |          |
|                           | Alone                                                                  | 39 (4.8)                           | 774 (95.1)                                     | 1 (.1)                                  | 5.740    | .057     |
|                           | Family/profesional/other support                                       | 13 (9.8)                           | 119 (90.2)                                     | 0 (.0)                                  |          |          |
| Marital status            |                                                                        |                                    |                                                |                                         |          |          |
|                           | Single                                                                 | 28 (6.0)                           | 434 (93.7)                                     | 1 (.2)                                  | 1.084    | .897     |
|                           | Married or in union                                                    | 21 (5.4)                           | 365 (94.6)                                     | 0 (.0)                                  |          |          |
|                           | Widowed/separated/divorced                                             | 2 (5.3)                            | 36 (94.7)                                      | 0 (.0)                                  |          |          |
| Living arrangements       |                                                                        |                                    |                                                |                                         |          |          |
|                           | Living alone/with children/with grandchildren                          | 5 (4.6)                            | 104 (95.4)                                     | 0 (.0)                                  | 2.333    | .887     |
|                           | Living with a partner/with a partner and children and/or grandchildren | 22 (6.2)                           | 331 (93.5)                                     | 1 (.3)                                  |          |          |
|                           | Living with parents and/or grandparents/with other relatives           | 16 (5.3)                           | 286 (94.7)                                     | 0 (.0)                                  |          |          |
|                           | Living with friends/other types                                        | 9 (5.0)                            | 172 (95.0)                                     | 0 (.0)                                  |          |          |
| Employment situation      |                                                                        |                                    |                                                |                                         |          |          |
|                           | Unemployed/retired                                                     | 27 (5.3)                           | 478 (94.7)                                     | 0 (.0)                                  | 1.197    | .550     |
|                           | Employed                                                               | 25 (5.7)                           | 415 (94.1)                                     | 1 (.2)                                  |          |          |
| Income level (€/month)    |                                                                        |                                    |                                                |                                         |          |          |
|                           | > 2001                                                                 | 28 (5.2)                           | 513 (94.8)                                     | 0 (.0)                                  | 5.374    | .251     |
|                           | 1001-2000                                                              | 13 (5.4)                           | 228 (94.6)                                     | 0 (.0)                                  |          |          |
|                           | < 1000                                                                 | 11 (6.7)                           | 152 (92.7)                                     | 1 (.6)                                  |          |          |

NOTE: N=Number of participants,  $\chi^2$ =Chi-square test, *p*=significance,  $\alpha$ -Risk=.05

**Table S2-3.** Association between the self-efficacy (Perform activities to keep your mind active) and the sociodemographic characteristics of the participants.

| Perform activities to keep your mind active |                                                                        | Frequency N (%)              |                                       |                                   | $\chi^2$ | <i>p</i> |
|---------------------------------------------|------------------------------------------------------------------------|------------------------------|---------------------------------------|-----------------------------------|----------|----------|
|                                             |                                                                        | Not be/ unsure of being able | Neither unsure nor sure of being able | Quite/ totally sure of being able |          |          |
| Age (years)                                 |                                                                        |                              |                                       |                                   |          |          |
|                                             | < 22                                                                   | 6 (2.8)                      | 210 (97.2)                            | 0 (.0)                            | 2.402    | .662     |
|                                             | 22-39                                                                  | 10 (2.5)                     | 396 (97.3)                            | 1 (.2)                            |          |          |
|                                             | ≥ 40                                                                   | 5 (1.6)                      | 317 (98.4)                            | 0 (.0)                            |          |          |
| Gender                                      |                                                                        |                              |                                       |                                   |          |          |
|                                             | Male                                                                   | 6 (2.0)                      | 298 (97.7)                            | 1 (.3)                            | 2.231    | .328     |
|                                             | Female                                                                 | 15 (2.3)                     | 626 (97.7)                            | 0 (.0)                            |          |          |
| Place of origin                             |                                                                        |                              |                                       |                                   |          |          |
|                                             | Rural area                                                             | 8 (2.3)                      | 336 (97.4)                            | 1 (.3)                            | 1.770    | .413     |
|                                             | Urban area                                                             | 13 (2.2)                     | 588 (97.8)                            | 0 (.0)                            |          |          |
| Education                                   |                                                                        |                              |                                       |                                   |          |          |
|                                             | Less than college or university                                        | 8 (6.2)                      | 122 (93.8)                            | 0 (.0)                            | 10.892   | .004     |
|                                             | College or university                                                  | 13 (1.6)                     | 802 (98.3)                            | 1 (.1)                            |          |          |
| Autonomy level                              |                                                                        |                              |                                       |                                   |          |          |
|                                             | Alone                                                                  | 16 (2.0)                     | 797 (97.9)                            | 1 (.1)                            | 1.895    | .388     |
|                                             | Family/profesional/other support                                       | 5 (3.8)                      | 127 (96.2)                            | 0 (.0)                            |          |          |
| Marital status                              |                                                                        |                              |                                       |                                   |          |          |
|                                             | Single                                                                 | 10 (2.2)                     | 452 (97.6)                            | 1 (.2)                            | 1.094    | .895     |
|                                             | Married or in union                                                    | 10 (2.6)                     | 376 (97.4)                            | 0 (.0)                            |          |          |
|                                             | Widowed/separated/divorced                                             | 1 (2.6)                      | 37 (97.4)                             | 0 (.0)                            |          |          |
| Living arrangements                         |                                                                        |                              |                                       |                                   |          |          |
|                                             | Living alone/with children/with grandchildren                          | 5 (4.6)                      | 104 (95.4)                            | 0 (.0)                            | 5.199    | .519     |
|                                             | Living with a partner/with a partner and children and/or grandchildren | 8 (2.3)                      | 345 (97.5)                            | 1 (.3)                            |          |          |
|                                             | Living with parents and/or grandparents/with other relatives           | 5 (1.7)                      | 297 (98.3)                            | 0 (.0)                            |          |          |
|                                             | Living with friends/other types                                        | 3 (1.7)                      | 178 (98.3)                            | 0 (.0)                            |          |          |
| Employment situation                        |                                                                        |                              |                                       |                                   |          |          |
|                                             | Unemployed/retired                                                     | 11 (2.2)                     | 494 (97.8)                            | 0 (.0)                            | 1.156    | .556     |
|                                             | Employed                                                               | 10 (2.3)                     | 430 (97.5)                            | 1 (.2)                            |          |          |
| Income level (€/month)                      |                                                                        |                              |                                       |                                   |          |          |
|                                             | > 2001                                                                 | 11 (2.0)                     | 530 (98.0)                            | 0 (.0)                            | 4.982    | .289     |
|                                             | 1001-2000                                                              | 6 (2.5)                      | 235 (97.5)                            | 0 (.0)                            |          |          |
|                                             | < 1000                                                                 | 4 (2.4)                      | 159 (97.0)                            | 1 (.6)                            |          |          |

NOTE: N=Number of participants,  $\chi^2$ =Chi-square test, *p*=significance,  $\alpha$ -Risk=.05

**Table S2-4.** Association between the self-efficacy (Perform household chores) and the sociodemographic characteristics of the participants.

| Perform household chores |                                                                        | Frequency N (%)                    |                                                |                                         | $\chi^2$ | <i>p</i> |
|--------------------------|------------------------------------------------------------------------|------------------------------------|------------------------------------------------|-----------------------------------------|----------|----------|
|                          |                                                                        | Not be/<br>unsure of<br>being able | Neither<br>unsure nor<br>sure of being<br>able | Quite/ totally<br>sure of being<br>able |          |          |
| Age (years)              |                                                                        |                                    |                                                |                                         |          |          |
|                          | < 22                                                                   | 6 (2.8)                            | 210 (97.2)                                     | 0 (.0)                                  | 6.797    | .033     |
|                          | 22-39                                                                  | 3 (.7)                             | 401 (99.3)                                     | 0 (.0)                                  |          |          |
|                          | ≥ 40                                                                   | 11 (3.4)                           | 309 (96.6)                                     | 0 (.0)                                  |          |          |
| Gender                   |                                                                        |                                    |                                                |                                         |          |          |
|                          | Male                                                                   | 13 (4.3)                           | 289 (95.7)                                     | 0 (.0)                                  | 10.153   | .001     |
|                          | Female                                                                 | 7 (1.1)                            | 632 (97.9)                                     | 0 (.0)                                  |          |          |
| Place of origin          |                                                                        |                                    |                                                |                                         |          |          |
|                          | Rural area                                                             | 9 (2.6)                            | 334 (97.4)                                     | 0 (.0)                                  | .645     | .422     |
|                          | Urban area                                                             | 11 (1.8)                           | 587 (98.2)                                     | 0 (.0)                                  |          |          |
| Education                |                                                                        |                                    |                                                |                                         |          |          |
|                          | Less than college or university                                        | 7 (5.4)                            | 123 (94.6)                                     | 0 (.0)                                  | 7.702    | .006     |
|                          | College or university                                                  | 13 (1.6)                           | 798 (98.4)                                     | 0 (.0)                                  |          |          |
| Autonomy level           |                                                                        |                                    |                                                |                                         |          |          |
|                          | Alone                                                                  | 17 (2.1)                           | 792 (97.9)                                     | 0 (.0)                                  | .016     | .899     |
|                          | Family/profesional/other support                                       | 3 (2.3)                            | 19 (97.7)                                      | 0 (.0)                                  |          |          |
| Marital status           |                                                                        |                                    |                                                |                                         |          |          |
|                          | Single                                                                 | 7 (1.5)                            | 453 (98.5)                                     | 0 (.0)                                  | 3.087    | .214     |
|                          | Married or in union                                                    | 10 (2.6)                           | 375 (97.4)                                     | 0 (.0)                                  |          |          |
|                          | Widowed/separated/divorced                                             | 2 (5.4)                            | 35 (94.6)                                      | 0 (.0)                                  |          |          |
| Living arrangements      |                                                                        |                                    |                                                |                                         |          |          |
|                          | Living alone/with children/with grandchildren                          | 2 (1.9)                            | 106 (98.1)                                     | 0 (.0)                                  | 4.588    | .205     |
|                          | Living with a partner/with a partner and children and/or grandchildren | 12 (3.4)                           | 341 (96.6)                                     | 0 (.0)                                  |          |          |
|                          | Living with parents and/or grandparents/with other relatives           | 4 (1.3)                            | 296 (98.7)                                     | 0 (.0)                                  |          |          |
|                          | Living with friends/other types                                        | 2 (1.1)                            | 178 (98.9)                                     | 0 (.0)                                  |          |          |
| Employment situation     |                                                                        |                                    |                                                |                                         |          |          |
|                          | Unemployed/retired                                                     | 8 (1.6)                            | 495 (98.4)                                     | 0 (.0)                                  | 1.487    | .223     |
|                          | Employed                                                               | 12 (2.7)                           | 426 (97.3)                                     | 0 (.0)                                  |          |          |
| Income level (€/month)   |                                                                        |                                    |                                                |                                         |          |          |
|                          | > 2001                                                                 | 9 (1.7)                            | 530 (98.3)                                     | 0 (.0)                                  | 2.435    | .296     |
|                          | 1001-2000                                                              | 5 (2.1)                            | 234 (97.9)                                     | 0 (.0)                                  |          |          |
|                          | < 1000                                                                 | 6 (3.7)                            | 157 (96.3)                                     | 0 (.0)                                  |          |          |

NOTE: N=Number of participants,  $\chi^2$ =Chi-square test, *p*=significance,  $\alpha$ -Risk=.05

**Table S2-5.** Association between the self-efficacy (Perform everyday activities on the street) and the sociodemographic characteristics of the participants.

| Perform everyday activities on the street                              | Frequency N (%)             |                                       |                                   | $\chi^2$ | <i>p</i> |
|------------------------------------------------------------------------|-----------------------------|---------------------------------------|-----------------------------------|----------|----------|
|                                                                        | Not be/unsure of being able | Neither unsure nor sure of being able | Quite/ totally sure of being able |          |          |
| <b>Age (years)</b>                                                     |                             |                                       |                                   |          |          |
| < 22                                                                   | 5 (2.3)                     | 211 (97.7)                            | 0 (.0)                            | 1.903    | .386     |
| 22-39                                                                  | 5 (1.2)                     | 399 (98.8)                            | 0 (.0)                            |          |          |
| ≥ 40                                                                   | 3 (.9)                      | 317 (99.1)                            | 0 (.0)                            |          |          |
| <b>Gender</b>                                                          |                             |                                       |                                   |          |          |
| Male                                                                   | 5 (1.7)                     | 297 (98.3)                            | 0 (.0)                            | .245     | .620     |
| Female                                                                 | 8 (1.3)                     | 631 (98.7)                            | 0 (.0)                            |          |          |
| <b>Place of origin</b>                                                 |                             |                                       |                                   |          |          |
| Rural area                                                             | 4 (1.2)                     | 339 (98.8)                            | 0 (.0)                            | .184     | .668     |
| Urban area                                                             | 9 (1.5)                     | 589 (98.5)                            | 0 (.0)                            |          |          |
| <b>Education</b>                                                       |                             |                                       |                                   |          |          |
| Less than college or university                                        | 4 (3.1)                     | 126 (96.6)                            | 0 (.0)                            | 3.182    | .074     |
| College or university                                                  | 9 (1.1)                     | 802 (98.9)                            | 0 (.0)                            |          |          |
| <b>Autonomy level</b>                                                  |                             |                                       |                                   |          |          |
| Alone                                                                  | 11 (1.4)                    | 798 (98.6)                            | 0 (.0)                            | .020     | .887     |
| Family/profesional/other support                                       | 2 (1.5)                     | 20 (98.5)                             | 0 (.0)                            |          |          |
| <b>Marital status</b>                                                  |                             |                                       |                                   |          |          |
| Single                                                                 | 9 (2.0)                     | 451 (98.0)                            | 0 (.0)                            | 2.402    | .301     |
| Married or in union                                                    | 3 (.8)                      | 382 (99.2)                            | 0 (.0)                            |          |          |
| Widowed/separated/divorced                                             | 1 (2.7)                     | 36 (97.3)                             | 0 (.0)                            |          |          |
| <b>Living arrangements</b>                                             |                             |                                       |                                   |          |          |
| Living alone/with children/with grandchildren                          | 2 (1.9)                     | 106 (98.1)                            | 0 (.0)                            | .611     | .894     |
| Living with a partner/with a partner and children and/or grandchildren | 4 (1.1)                     | 349 (98.9)                            | 0 (.0)                            |          |          |
| Living with parents and/or grandparents/with other relatives           | 5 (1.7)                     | 295 (98.3)                            | 0 (.0)                            |          |          |
| Living with friends/other types                                        | 2 (1.1)                     | 178 (98.9)                            | 0 (.0)                            |          |          |
| <b>Employment situation</b>                                            |                             |                                       |                                   |          |          |
| Unemployed/retired                                                     | 8 (1.6)                     | 495 (98.4)                            | 0 (.0)                            | .346     | .556     |
| Employed                                                               | 5 (1.1)                     | 433 (98.9)                            | 0 (.0)                            |          |          |
| <b>Income level (€/month)</b>                                          |                             |                                       |                                   |          |          |
| > 2001                                                                 | 10 (1.9)                    | 529 (98.1)                            | 0 (.0)                            | 2.544    | .280     |
| 1001-2000                                                              | 1 (.4)                      | 238 (99.6)                            | 0 (.0)                            |          |          |
| < 1000                                                                 | 2 (1.2)                     | 161 (98.8)                            | 0 (.0)                            |          |          |

NOTE: N=Number of participants,  $\chi^2$ =Chi-square test, *p*=significance,  $\alpha$ -Risk=.05

**Table S2-6.** Association between the self-efficacy (Interact with other people) and the sociodemographic characteristics of the participants.

| Interact with other people    |                                                                        | Frequency N (%)                    |                                                |                                         | $\chi^2$ | <i>p</i> |
|-------------------------------|------------------------------------------------------------------------|------------------------------------|------------------------------------------------|-----------------------------------------|----------|----------|
|                               |                                                                        | Not be/<br>unsure of<br>being able | Neither<br>unsure nor<br>sure of being<br>able | Quite/ totally<br>sure of being<br>able |          |          |
| <b>Age (years)</b>            |                                                                        |                                    |                                                |                                         |          |          |
|                               | < 22                                                                   | 14 (6.5)                           | 202 (93.5)                                     | 14 (6.5)                                | 10.335   | .006     |
|                               | 22-39                                                                  | 18 (4.5)                           | 386 (95.5)                                     | 18 (4.5)                                |          |          |
|                               | ≥ 40                                                                   | 4 (1.3)                            | 316 (98.8)                                     | 4 (1.3)                                 |          |          |
| <b>Gender</b>                 |                                                                        |                                    |                                                |                                         |          |          |
|                               | Male                                                                   | 14 (4.6)                           | 288 (95.4)                                     | 0 (.0)                                  | .583     | .445     |
|                               | Female                                                                 | 23 (3.6)                           | 616 (96.4)                                     | 0 (.0)                                  |          |          |
| <b>Place of origin</b>        |                                                                        |                                    |                                                |                                         |          |          |
|                               | Rural area                                                             | 13 (3.8)                           | 330 (96.2)                                     | 0 (.0)                                  | .029     | .865     |
|                               | Urban area                                                             | 24 (4.0)                           | 574 (96.0)                                     | 0 (.0)                                  |          |          |
| <b>Education</b>              |                                                                        |                                    |                                                |                                         |          |          |
|                               | Less than college or university                                        | 9 (6.9)                            | 121 (93.1)                                     | 0 (.0)                                  | 3.573    | .059     |
|                               | College or university                                                  | 28 (3.5)                           | 783 (96.5)                                     | 0 (.0)                                  |          |          |
| <b>Autonomy level</b>         |                                                                        |                                    |                                                |                                         |          |          |
|                               | Alone                                                                  | 26 (3.2)                           | 783 (96.8)                                     | 0 (.0)                                  | 7.874    | .005     |
|                               | Family/profesional/other support                                       | 11 (8.3.0)                         | 121 (91.7)                                     | 0 (.0)                                  |          |          |
| <b>Marital status</b>         |                                                                        |                                    |                                                |                                         |          |          |
|                               | Single                                                                 | 27 (5.9)                           | 433 (94.1)                                     | 0 (.0)                                  | 7.884    | .019     |
|                               | Married or in union                                                    | 8 (2.1)                            | 377 (97.9)                                     | 0 (.0)                                  |          |          |
|                               | Widowed/separated/divorced                                             | 1 (2.7)                            | 36 (97.3)                                      | 0 (.0)                                  |          |          |
| <b>Living arrangements</b>    |                                                                        |                                    |                                                |                                         |          |          |
|                               | Living alone/with children/with grandchildren                          | 3 (2.8)                            | 105 (97.2)                                     | 0 (.0)                                  | 3.901    | .272     |
|                               | Living with a partner/with a partner and children and/or grandchildren | 10 (2.8)                           | 343 (97.2)                                     | 0 (.0)                                  |          |          |
|                               | Living with parents and/or grandparents/with other relatives           | 17 (5.7)                           | 283 (94.3)                                     | 0 (.0)                                  |          |          |
|                               | Living with friends/other types                                        | 7 (3.9)                            | 173 (96.1)                                     | 0 (.0)                                  |          |          |
| <b>Employment situation</b>   |                                                                        |                                    |                                                |                                         |          |          |
|                               | Unemployed/retired                                                     | 22 (4.4)                           | 481 (95.6)                                     | 0 (.0)                                  | .558     | .455     |
|                               | Employed                                                               | 15 (3.4)                           | 423 (96.6)                                     | 0 (.0)                                  |          |          |
| <b>Income level (€/month)</b> |                                                                        |                                    |                                                |                                         |          |          |
|                               | > 2001                                                                 | 26 (4.8)                           | 513 (95.2)                                     | 0 (.0)                                  | 2.736    | .255     |
|                               | 1001-2000                                                              | 6 (2.5)                            | 233 (97.5)                                     | 0 (.0)                                  |          |          |
|                               | < 1000                                                                 | 5 (3.1)                            | 158 (96.6)                                     | 0 (.0)                                  |          |          |

NOTE: N=Number of participants,  $\chi^2$ =Chi-square test, *p*=significance,  $\alpha$ -Risk=.05



**Table S2-7.** Association between the self-efficacy (Perform educational activities) and the sociodemographic characteristics of the participants.

| Perform educational activities |                                                                        | Frequency N (%)                    |                                                |                                         | $\chi^2$ | <i>p</i> |
|--------------------------------|------------------------------------------------------------------------|------------------------------------|------------------------------------------------|-----------------------------------------|----------|----------|
|                                |                                                                        | Not be/<br>unsure of<br>being able | Neither<br>unsure nor<br>sure of being<br>able | Quite/ totally<br>sure of being<br>able |          |          |
| Age (years)                    |                                                                        |                                    |                                                |                                         |          |          |
|                                | < 22                                                                   | 4 (1.9)                            | 212 (98.1)                                     | 0 (.0)                                  | 1.706    | .426     |
|                                | 22-39                                                                  | 5 (1.2)                            | 399 (98.8)                                     | 0 (.0)                                  |          |          |
|                                | ≥ 40                                                                   | 2 (.6)                             | 318 (99.4)                                     | 0 (.0)                                  |          |          |
| Gender                         |                                                                        |                                    |                                                |                                         |          |          |
|                                | Male                                                                   | 6 (2.0)                            | 296 (98.0)                                     | 0 (.0)                                  | 1.788    | .181     |
|                                | Female                                                                 | 6 (.9)                             | 633 (99.1)                                     | 0 (.0)                                  |          |          |
| Place of origin                |                                                                        |                                    |                                                |                                         |          |          |
|                                | Rural area                                                             | 5 (1.5)                            | 338 (98.5)                                     | 0 (.0)                                  | .143     | .706     |
|                                | Urban area                                                             | 7 (1.2)                            | 591 (98.8)                                     | 0 (.0)                                  |          |          |
| Education                      |                                                                        |                                    |                                                |                                         |          |          |
|                                | Less than college or university                                        | 2 (1.5)                            | 128 (98.5)                                     | 0 (.0)                                  | .083     | .773     |
|                                | College or university                                                  | 10 (1.2)                           | 801 (98.8)                                     | 0 (.0)                                  |          |          |
| Autonomy level                 |                                                                        |                                    |                                                |                                         |          |          |
|                                | Alone                                                                  | 9 (1.1)                            | 800 (98.9)                                     | 0 (.0)                                  | 1.213    | .271     |
|                                | Family/profesional/other support                                       | 3 (2.3)                            | 129 (97.7)                                     | 0 (.0)                                  |          |          |
| Marital status                 |                                                                        |                                    |                                                |                                         |          |          |
|                                | Single                                                                 | 8 (1.7)                            | 452 (98.3)                                     | 0 (.0)                                  | 3.196    | .202     |
|                                | Married or in union                                                    | 2 (.5)                             | 383 (99.5)                                     | 0 (.0)                                  |          |          |
|                                | Widowed/separated/divorced                                             | 1 (2.7)                            | 36 (97.3)                                      | 0 (.0)                                  |          |          |
| Living arrangements            |                                                                        |                                    |                                                |                                         |          |          |
|                                | Living alone/with children/with grandchildren                          | 2 (1.9)                            | 106 (98.1)                                     | 0 (.0)                                  | 2.507    | .474     |
|                                | Living with a partner/with a partner and children and/or grandchildren | 4 (1.1)                            | 349 (98.9)                                     | 0 (.0)                                  |          |          |
|                                | Living with parents and/or grandparents/with other relatives           | 2 (.7)                             | 298 (99.3)                                     | 0 (.0)                                  |          |          |
|                                | Living with friends/other types                                        | 4 (2.2)                            | 176 (97.8)                                     | 0 (.0)                                  |          |          |
| Employment situation           |                                                                        |                                    |                                                |                                         |          |          |
|                                | Unemployed/retired                                                     | 7 (1.4)                            | 496 (98.6)                                     | 0 (.0)                                  | .116     | .733     |
|                                | Employed                                                               | 5 (1.1)                            | 433 (98.8)                                     | 0 (.0)                                  |          |          |
| Income level (€/month)         |                                                                        |                                    |                                                |                                         |          |          |
|                                | > 2001                                                                 | 8 (1.5)                            | 531 (98.5)                                     | 0 (.0)                                  | 1.994    | .369     |
|                                | 1001-2000                                                              | 1 (.4)                             | 238 (99.6)                                     | 0 (.0)                                  |          |          |
|                                | < 1000                                                                 | 3 (1.8)                            | 160 (98.2)                                     | 0 (.0)                                  |          |          |

NOTE: N=Number of participants,  $\chi^2$ =Chi-square test, *p*=significance,  $\alpha$ -Risk=.05

**Table S2-8.** Association between the self-efficacy (Perform leisure activities) and the sociodemographic characteristics of the participants.

| Perform leisure activities |                                                                        | Frequency N (%)                    |                                                |                                         | $\chi^2$ | <i>p</i> |
|----------------------------|------------------------------------------------------------------------|------------------------------------|------------------------------------------------|-----------------------------------------|----------|----------|
|                            |                                                                        | Not be/<br>unsure of<br>being able | Neither<br>unsure nor<br>sure of being<br>able | Quite/ totally<br>sure of being<br>able |          |          |
| Age (years)                |                                                                        |                                    |                                                |                                         |          |          |
|                            | < 22                                                                   | 7 (3.2)                            | 209 (96.8)                                     | 0 (.0)                                  | 3.658    | .161     |
|                            | 22-39                                                                  | 8 (2.0)                            | 396 (98.0)                                     | 0 (.0)                                  |          |          |
|                            | ≥ 40                                                                   | 3 (.9)                             | 317 (99.1)                                     | 0 (.0)                                  |          |          |
| Gender                     |                                                                        |                                    |                                                |                                         |          |          |
|                            | Male                                                                   | 6 (2.0)                            | 296 (98.0)                                     | 0 (.0)                                  | 0.13     | .909     |
|                            | Female                                                                 | 12 (1.9)                           | 627 (98.1)                                     | 0 (.0)                                  |          |          |
| Place of origin            |                                                                        |                                    |                                                |                                         |          |          |
|                            | Rural area                                                             | 5 (1.5)                            | 338 (98.5)                                     | 0 (.0)                                  | .596     | .440     |
|                            | Urban area                                                             | 13 (2.2)                           | 585 (97.8)                                     | 0 (.0)                                  |          |          |
| Education                  |                                                                        |                                    |                                                |                                         |          |          |
|                            | Less than college or university                                        | 3 (2.3)                            | 127 (97.7)                                     | 0 (.0)                                  | .125     | .723     |
|                            | College or university                                                  | 15 (1.8)                           | 796 (98.2)                                     | 0 (.0)                                  |          |          |
| Autonomy level             |                                                                        |                                    |                                                |                                         |          |          |
|                            | Alone                                                                  | 14 (1.7)                           | 795 (98.3)                                     | 0 (.0)                                  | 1.022    | .312     |
|                            | Family/profesional/other support                                       | 4 (3.0)                            | 128 (97.0)                                     | 0 (.0)                                  |          |          |
| Marital status             |                                                                        |                                    |                                                |                                         |          |          |
|                            | Single                                                                 | 12 (2.6)                           | 448 (97.4)                                     | 0 (.0)                                  | 1.961    | .375     |
|                            | Married or in union                                                    | 6 (1.6)                            | 379 (98.4)                                     | 0 (.0)                                  |          |          |
|                            | Widowed/separated/divorced                                             | 0 (.0)                             | 37 (100.0)                                     | 0 (.0)                                  |          |          |
| Living arrangements        |                                                                        |                                    |                                                |                                         |          |          |
|                            | Living alone/with children/with grandchildren                          | 2 (1.9)                            | 106 (98.1)                                     | 0 (.0)                                  | .082     | .994     |
|                            | Living with a partner/with a partner and children and/or grandchildren | 7 (2.0)                            | 346 (98.0)                                     | 0 (.0)                                  |          |          |
|                            | Living with parents and/or grandparents/with other relatives           | 6 (2.0)                            | 294 (98.0)                                     | 0 (.0)                                  |          |          |
|                            | Living with friends/other types                                        | 3 (1.7)                            | 177 (98.3)                                     | 0 (.0)                                  |          |          |
| Employment situation       |                                                                        |                                    |                                                |                                         |          |          |
|                            | Unemployed/retired                                                     | 10 (2.0)                           | 493 (98.0)                                     | 0 (.0)                                  | .033     | .857     |
|                            | Employed                                                               | 8 (1.8)                            | 430 (98.2)                                     | 0 (.0)                                  |          |          |
| Income level (€/month)     |                                                                        |                                    |                                                |                                         |          |          |
|                            | > 2001                                                                 | 13 (2.4)                           | 526 (97.6)                                     | 0 (.0)                                  | 1.675    | .433     |
|                            | 1001-2000                                                              | 3 (1.3)                            | 236 (98.7)                                     | 0 (.0)                                  |          |          |
|                            | < 1000                                                                 | 2 (1.2)                            | 161 (98.8)                                     | 0 (.0)                                  |          |          |

NOTE: N=Number of participants,  $\chi^2$ =Chi-square test, *p*=significance,  $\alpha$ -Risk=.05

**Table S2-9.** Association between the self-efficacy (Manage your money) and the sociodemographic characteristics of the participants.

| Manage your money      |                                                                        | Frequency N (%)                    |                                                |                                         | $\chi^2$ | <i>p</i> |
|------------------------|------------------------------------------------------------------------|------------------------------------|------------------------------------------------|-----------------------------------------|----------|----------|
|                        |                                                                        | Not be/<br>unsure of<br>being able | Neither<br>unsure nor<br>sure of being<br>able | Quite/ totally<br>sure of being<br>able |          |          |
| Age (years)            |                                                                        |                                    |                                                |                                         |          |          |
|                        | < 22                                                                   | 11 (5.1)                           | 205 (94.9)                                     | 0 (.0)                                  | 10.537   | .005     |
|                        | 22-39                                                                  | 6 (1.5)                            | 398 (98.5)                                     | 0 (.0)                                  |          |          |
|                        | ≥ 40                                                                   | 4 (1.3)                            | 316 (98.8)                                     | 0 (.0)                                  |          |          |
| Gender                 |                                                                        |                                    |                                                |                                         |          |          |
|                        | Male                                                                   | 6 (2.0)                            | 296 (98.0)                                     | 0 (.0)                                  | .122     | .727     |
|                        | Female                                                                 | 15 (2.3)                           | 624 (97.7)                                     | 0 (.0)                                  |          |          |
| Place of origin        |                                                                        |                                    |                                                |                                         |          |          |
|                        | Rural area                                                             | 7 (2.0)                            | 336 (98.0)                                     | 0 (.0)                                  | .090     | .764     |
|                        | Urban area                                                             | 14 (2.3)                           | 584 (97.7)                                     | 0 (.0)                                  |          |          |
| Education              |                                                                        |                                    |                                                |                                         |          |          |
|                        | Less than college or university                                        | 5 (3.8)                            | 125 (96.2)                                     | 0 (.0)                                  | 1.802    | .179     |
|                        | College or university                                                  | 16 (2.0)                           | 795 (98.0)                                     | 0 (.0)                                  |          |          |
| Autonomy level         |                                                                        |                                    |                                                |                                         |          |          |
|                        | Alone                                                                  | 15 (1.9)                           | 794 (98.1)                                     | 0 (.0)                                  | 3.767    | .052     |
|                        | Family/profesional/other support                                       | 6 (4.5)                            | 126 (95.5)                                     | 0 (.0)                                  |          |          |
| Marital status         |                                                                        |                                    |                                                |                                         |          |          |
|                        | Single                                                                 | 14 (3.0)                           | 446 (97.0)                                     | 0 (.0)                                  | 2.912    | .233     |
|                        | Married or in union                                                    | 5 (1.3)                            | 380 (98.7)                                     | 0 (.0)                                  |          |          |
|                        | Widowed/separated/divorced                                             | 1 (2.7)                            | 36 (97.3)                                      | 0 (.0)                                  |          |          |
| Living arrangements    |                                                                        |                                    |                                                |                                         |          |          |
|                        | Living alone/with children/with grandchildren                          | 1 (0.9)                            | 107 (99.1)                                     | 0 (.0)                                  | 2.971    | .396     |
|                        | Living with a partner/with a partner and children and/or grandchildren | 6 (1.7)                            | 347 (98.3)                                     | 0 (.0)                                  |          |          |
|                        | Living with parents and/or grandparents/with other relatives           | 10 (3.3)                           | 290 (96.7)                                     | 0 (.0)                                  |          |          |
|                        | Living with friends/other types                                        | 4 (2.2)                            | 176 (97.8)                                     | 0 (.0)                                  |          |          |
| Employment situation   |                                                                        |                                    |                                                |                                         |          |          |
|                        | Unemployed/retired                                                     | 12 (2.4)                           | 491 (97.6)                                     | 0 (.0)                                  | .117     | .732     |
|                        | Employed                                                               | 9 (2.1)                            | 429 (97.9)                                     | 0 (.0)                                  |          |          |
| Income level (€/month) |                                                                        |                                    |                                                |                                         |          |          |
|                        | > 2001                                                                 | 15 (2.8)                           | 524 (97.2)                                     | 0 (.0)                                  | 2.919    | .232     |
|                        | 1001-2000                                                              | 2 (.8)                             | 237 (99.2)                                     | 0 (.0)                                  |          |          |
|                        | < 1000                                                                 | 4 (2.5)                            | 159 (97.5)                                     | 0 (.0)                                  |          |          |

NOTE: N=Number of participants,  $\chi^2$ =Chi-square test, *p*=significance,  $\alpha$ -Risk=.05

**Table S3-1.** Association between the social support (Have a wide social circle) and the sociodemographic characteristics of the participants.

| Have a wide social circle |                                                                        | Frequency N (%) |                            |        | $\chi^2$ | <i>p</i> |
|---------------------------|------------------------------------------------------------------------|-----------------|----------------------------|--------|----------|----------|
|                           |                                                                        | Disagree        | Neither agree nor disagree | Agree  |          |          |
| Age (years)               |                                                                        |                 |                            |        |          |          |
|                           | < 22                                                                   | 50 (23.4)       | 164 (76.6)                 | 0 (.0) | .700     | .705     |
|                           | 22-39                                                                  | 86 (21.6)       | 313 (78.4)                 | 0 (.0) |          |          |
|                           | ≥ 40                                                                   | 64 (20.3)       | 251 (79.7)                 | 0 (.0) |          |          |
| Gender                    |                                                                        |                 |                            |        |          |          |
|                           | Male                                                                   | 59 (19.7)       | 241 (80.3)                 | 0 (.0) | .909     | .340     |
|                           | Female                                                                 | 141 (22.4)      | 488 (77.6)                 | 0 (.0) |          |          |
| Place of origin           |                                                                        |                 |                            |        |          |          |
|                           | Rural area                                                             | 79 (23.4)       | 258 (76.6)                 | 0 (.0) | 1.146    | .284     |
|                           | Urban area                                                             | 121 (20.4)      | 471 (79.6)                 | 0 (.0) |          |          |
| Education                 |                                                                        |                 |                            |        |          |          |
|                           | Less than college or university                                        | 35 (26.9)       | 95 (73.1)                  | 0 (.0) | 2.604    | .107     |
|                           | College or university                                                  | 165 (20.7)      | 634 (79.3)                 | 0 (.0) |          |          |
| Autonomy level            |                                                                        |                 |                            |        |          |          |
|                           | Alone                                                                  | 168 (21.1)      | 630 (78.9)                 | 0 (.0) | .759     | .384     |
|                           | Family/profesional/other support                                       | 32 (24.4)       | 99 (75.6)                  | 0 (.0) |          |          |
| Marital status            |                                                                        |                 |                            |        |          |          |
|                           | Single                                                                 | 101 (22.1)      | 356 (77.9)                 | 0 (.0) | 1.422    | .491     |
|                           | Married or in union                                                    | 80 (21.2)       | 297 (78.8)                 | 0 (.0) |          |          |
|                           | Widowed/separated/divorced                                             | 11 (29.7)       | 26 (70.3)                  | 0 (.0) |          |          |
| Living arrangements       |                                                                        |                 |                            |        |          |          |
|                           | Living alone/with children/with grandchildren                          | 24 (22.2)       | 84 (77.8)                  | 0 (.0) | .632     | .889     |
|                           | Living with a partner/with a partner and children and/or grandchildren | 74 (21.4)       | 271 (78.6)                 | 0 (.0) |          |          |
|                           | Living with parents and/or grandparents/with other relatives           | 67 (22.6)       | 230 (77.4)                 | 0 (.0) |          |          |
|                           | Living with friends/other types                                        | 35 (19.6)       | 144 (80.4)                 | 0 (.0) |          |          |
| Employment situation      |                                                                        |                 |                            |        |          |          |
|                           | Unemployed/retired                                                     | 110 (22.2)      | 386 (77.8)                 | 0 (.0) | .265     | .607     |
|                           | Employed                                                               | 90 (20.8)       | 343 (79.2)                 | 0 (.0) |          |          |
| Income level (€/month)    |                                                                        |                 |                            |        |          |          |
|                           | > 2001                                                                 | 119 (22.3)      | 415 (77.7)                 | 0 (.0) | .621     | .733     |
|                           | 1001-2000                                                              | 46 (19.7)       | 187 (80.3)                 | 0 (.0) |          |          |
|                           | < 1000                                                                 | 35 (21.6)       | 127 (78.4)                 | 0 (.0) |          |          |

NOTE: N=Number of participants,  $\chi^2$ =Chi-square test, *p*=significance,  $\alpha$ -Risk=.05

**Table S3-2.** Association between the social support (Have good social and communication skills) and the sociodemographic characteristics of the participants.

| Have good social and communication skills |                                                                        | Frequency N (%) |                            |        | $\chi^2$ | <i>p</i> |
|-------------------------------------------|------------------------------------------------------------------------|-----------------|----------------------------|--------|----------|----------|
|                                           |                                                                        | Disagree        | Neither agree nor disagree | Agree  |          |          |
| Age (years)                               |                                                                        |                 |                            |        |          |          |
|                                           | < 22                                                                   | 27 (12.6)       | 187 (87.4)                 | 0 (.0) | 3.361    | .186     |
|                                           | 22-39                                                                  | 44 (11.0)       | 355 (89.0)                 | 0 (.0) |          |          |
|                                           | ≥ 40                                                                   | 25 (7.9)        | 290 (92.1)                 | 0 (.0) |          |          |
| Gender                                    |                                                                        |                 |                            |        |          |          |
|                                           | Male                                                                   | 35 (11.7)       | 265 (88.3)                 | 0 (.0) | .850     | .357     |
|                                           | Female                                                                 | 61 (9.7)        | 568 (90.3)                 | 0 (.0) |          |          |
| Place of origin                           |                                                                        |                 |                            |        |          |          |
|                                           | Rural area                                                             | 36 (10.7)       | 301 (89.3)                 | 0 (.0) | .069     | .792     |
|                                           | Urban area                                                             | 60 (10.1)       | 532 (89.9)                 | 0 (.0) |          |          |
| Education                                 |                                                                        |                 |                            |        |          |          |
|                                           | Less than college or university                                        | 19 (14.6)       | 111 (85.4)                 | 0 (.0) | 2.991    | .084     |
|                                           | College or university                                                  | 77 (9.6)        | 722 (90.4)                 | 0 (.0) |          |          |
| Autonomy level                            |                                                                        |                 |                            |        |          |          |
|                                           | Alone                                                                  | 76 (9.5)        | 722 (90.5)                 | 0 (.0) | 4.006    | .045     |
|                                           | Family/profesional/other support                                       | 20 (15.3)       | 111 (84.7)                 | 0 (.0) |          |          |
| Marital status                            |                                                                        |                 |                            |        |          |          |
|                                           | Single                                                                 | 56 (12.3)       | 401 (87.7)                 | 0 (.0) | 2.535    | .282     |
|                                           | Married or in union                                                    | 34 (9.0)        | 343 (91.0)                 | 0 (.0) |          |          |
|                                           | Widowed/separated/divorced                                             | 3 (8.1)         | 34 (91.9)                  | 0 (.0) |          |          |
| Living arrangements                       |                                                                        |                 |                            |        |          |          |
|                                           | Living alone/with children/with grandchildren                          | 12 (11.1)       | 96 (88.9)                  | 0 (.0) | .930     | .818     |
|                                           | Living with a partner/with a partner and children and/or grandchildren | 34 (9.9)        | 311 (90.1)                 | 0 (.0) |          |          |
|                                           | Living with parents and/or grandparents/with other relatives           | 34 (11.4)       | 263 (88.6)                 | 0 (.0) |          |          |
|                                           | Living with friends/other types                                        | 16 (8.9)        | 163 (91.1)                 | 0 (.0) |          |          |
| Employment situation                      |                                                                        |                 |                            |        |          |          |
|                                           | Unemployed/retired                                                     | 49 (9.9)        | 447 (90.1)                 | 0 (.0) | .237     | .626     |
|                                           | Employed                                                               | 47 (10.9)       | 386 (89.1)                 | 0 (.0) |          |          |
| Income level (€/month)                    |                                                                        |                 |                            |        |          |          |
|                                           | > 2001                                                                 | 60 (11.2)       | 474 (88.8)                 | 0 (.0) | 1.967    | .374     |
|                                           | 1001-2000                                                              | 24 (10.3)       | 209 (89.7)                 | 0 (.0) |          |          |
|                                           | < 1000                                                                 | 12 (7.4)        | 150 (92.6)                 | 0 (.0) |          |          |

NOTE: N=Number of participants,  $\chi^2$ =Chi-square test, *p*=significance,  $\alpha$ -Risk=.05

**Table S3-3.** Association between the social support (Feel lonely) and the sociodemographic characteristics of the participants.

| Feel lonely            |                                                                        | Frequency N (%) |                            |        | $\chi^2$ | $p$   |
|------------------------|------------------------------------------------------------------------|-----------------|----------------------------|--------|----------|-------|
|                        |                                                                        | Disagree        | Neither agree nor disagree | Agree  |          |       |
| Age (years)            |                                                                        |                 |                            |        |          |       |
|                        | < 22                                                                   | 136 (63.6)      | 78 (36.4)                  | 0 (.0) | 6.564    | .038  |
|                        | 22-39                                                                  | 259 (64.9)      | 140 (35.1)                 | 0 (.0) |          |       |
|                        | ≥ 40                                                                   | 229 (72.7)      | 86 (27.3)                  | 0 (.0) |          |       |
| Gender                 |                                                                        |                 |                            |        |          |       |
|                        | Male                                                                   | 205 (68.3)      | 95 (31.7)                  | 0 (.0) | .225     | .635  |
|                        | Female                                                                 | 420 (66.8)      | 209 (33.2)                 | 0 (.0) |          |       |
| Place of origin        |                                                                        |                 |                            |        |          |       |
|                        | Rural area                                                             | 223 (66.2)      | 114 (33.8)                 | 0 (.0) | .293     | .588  |
|                        | Urban area                                                             | 402 (67.9)      | 190 (32.1)                 | 0 (.0) |          |       |
| Education              |                                                                        |                 |                            |        |          |       |
|                        | Less than college or university                                        | 76 (58.5)       | 54 (41.5)                  | 0 (.0) | 5.335    | .021  |
|                        | College or university                                                  | 549 (68.7)      | 250 (31.3)                 | 0 (.0) |          |       |
| Autonomy level         |                                                                        |                 |                            |        |          |       |
|                        | Alone                                                                  | 541 (67.8)      | 257 (32.2)                 | 0 (.0) | .689     | .406  |
|                        | Family/profesional/other support                                       | 84 (64.1)       | 47 (35.9)                  | 0 (.0) |          |       |
| Marital status         |                                                                        |                 |                            |        |          |       |
|                        | Single                                                                 | 292 (63.9)      | 165 (36.1)                 | 0 (.0) | 9.967    | .007  |
|                        | Married or in union                                                    | 279 (74.0)      | 98 (26.0)                  | 0 (.0) |          |       |
|                        | Widowed/separated/divorced                                             | 24 (64.9)       | 13 (35.1)                  | 0 (.0) |          |       |
| Living arrangements    |                                                                        |                 |                            |        |          |       |
|                        | Living alone/with children/with grandchildren                          | 59 (54.6)       | 49 (45.4)                  | 0 (.0) | 27.213   | <.000 |
|                        | Living with a partner/with a partner and children and/or grandchildren | 261 (75.7)      | 84 (24.3)                  | 0 (.0) |          |       |
|                        | Living with parents and/or grandparents/with other relatives           | 178 (59.9)      | 119 (40.1)                 | 0 (.0) |          |       |
|                        | Living with friends/other types                                        | 127 (70.9)      | 52 (29.1)                  | 0 (.0) |          |       |
| Employment situation   |                                                                        |                 |                            |        |          |       |
|                        | Unemployed/retired                                                     | 321 (64.7)      | 175 (35.3)                 | 0 (.0) | 3.165    | .075  |
|                        | Employed                                                               | 304 (70.2)      | 129 (29.8)                 | 0 (.0) |          |       |
| Income level (€/month) |                                                                        |                 |                            |        |          |       |
|                        | > 2001                                                                 | 345 (64.6)      | 189 (35.4)                 | 0 (.0) | 5.334    | .069  |
|                        | 1001-2000                                                              | 160 (68.7)      | 73 (31.3)                  | 0 (.0) |          |       |
|                        | < 1000                                                                 | 120 (74.1)      | 42 (25.9)                  | 0 (.0) |          |       |

NOTE: N=Number of participants,  $\chi^2$ =Chi-square test, *p*=significance,  $\alpha$ -Risk=.05

**Table S3-4.** Association between the social support (Count on other people who comfort you) and the sociodemographic characteristics of the participants.

| Count on other people who comfort you |                                                                        | Frequency N (%) |                            |        | $\chi^2$ | <i>p</i> |
|---------------------------------------|------------------------------------------------------------------------|-----------------|----------------------------|--------|----------|----------|
|                                       |                                                                        | Disagree        | Neither agree nor disagree | Agree  |          |          |
| <b>Age (years)</b>                    |                                                                        |                 |                            |        |          |          |
|                                       | < 22                                                                   | 6 (2.8)         | 208 (97.2)                 | 0 (.0) | .724     | .696     |
|                                       | 22-39                                                                  | 16 (4.0)        | 383 (96.0)                 | 0 (.0) |          |          |
|                                       | ≥ 40                                                                   | 13 (4.1)        | 302 (95.6)                 | 0 (.0) |          |          |
| <b>Gender</b>                         |                                                                        |                 |                            |        |          |          |
|                                       | Male                                                                   | 13 (4.3)        | 287 (95.7)                 | 0 (.0) | .391     | .532     |
|                                       | Female                                                                 | 22 (3.5)        | 607 (96.5)                 | 0 (.0) |          |          |
| <b>Place of origin</b>                |                                                                        |                 |                            |        |          |          |
|                                       | Rural area                                                             | 12 (3.6)        | 325 (96.4)                 | 0 (.0) | .062     | .803     |
|                                       | Urban area                                                             | 23 (3.9)        | 569 (96.1)                 | 0 (.0) |          |          |
| <b>Education</b>                      |                                                                        |                 |                            |        |          |          |
|                                       | Less than college or university                                        | 8 (6.2)         | 122 (93.8)                 | 0 (.0) | 2.374    | .123     |
|                                       | College or university                                                  | 27 (3.4)        | 772 (96.6)                 | 0 (.0) |          |          |
| <b>Autonomy level</b>                 |                                                                        |                 |                            |        |          |          |
|                                       | Alone                                                                  | 30 (3.8)        | 768 (96.2)                 | 0 (.0) | .001     | .974     |
|                                       | Family/profesional/other support                                       | 5 (3.8)         | 126 (96.2)                 | 0 (.0) |          |          |
| <b>Marital status</b>                 |                                                                        |                 |                            |        |          |          |
|                                       | Single                                                                 | 18 (3.9)        | 439 (96.1)                 | 0 (.0) | .194     | .908     |
|                                       | Married or in union                                                    | 15 (4.0)        | 362 (96.0)                 | 0 (.0) |          |          |
|                                       | Widowed/separated/divorced                                             | 2 (5.4)         | 35 (94.6)                  | 0 (.0) |          |          |
| <b>Living arrangements</b>            |                                                                        |                 |                            |        |          |          |
|                                       | Living alone/with children/with grandchildren                          | 4 (3.7)         | 104 (96.3)                 | 0 (.0) | 5.473    | .140     |
|                                       | Living with a partner/with a partner and children and/or grandchildren | 18 (5.2)        | 327 (94.8)                 | 0 (.0) |          |          |
|                                       | Living with parents and/or grandparents/with other relatives           | 11 (3.7)        | 286 (96.3)                 | 0 (.0) |          |          |
|                                       | Living with friends/other types                                        | 2 (1.1)         | 177 (98.9)                 | 0 (.0) |          |          |
| <b>Employment situation</b>           |                                                                        |                 |                            |        |          |          |
|                                       | Unemployed/retired                                                     | 18 (3.6)        | 478 (96.4)                 | 0 (.0) | .056     | .812     |
|                                       | Employed                                                               | 17 (3.9)        | 416 (96.1)                 | 0 (.0) |          |          |
| <b>Income level (€/month)</b>         |                                                                        |                 |                            |        |          |          |
|                                       | > 2001                                                                 | 20 (3.7)        | 514 (96.3)                 | 0 (.0) | .008     | .996     |
|                                       | 1001-2000                                                              | 9 (3.9)         | 224 (96.1)                 | 0 (.0) |          |          |
|                                       | < 1000                                                                 | 6 (3.7)         | 156 (96.3)                 | 0 (.0) |          |          |

NOTE: N=Number of participants,  $\chi^2$ =Chi-square test, *p*=significance,  $\alpha$ -Risk=.05

**Table S3-5.** Association between the social support (Have the support of other people for anything you need) and the sociodemographic characteristics of the participants.

| Have the support of other people<br>for anything you need |                                                                        | Frequency N (%) |                               |        | $\chi^2$ | <i>p</i> |
|-----------------------------------------------------------|------------------------------------------------------------------------|-----------------|-------------------------------|--------|----------|----------|
|                                                           |                                                                        | Disagree        | Neither agree<br>nor disagree | Agree  |          |          |
| <b>Age (years)</b>                                        |                                                                        |                 |                               |        |          |          |
|                                                           | < 22                                                                   | 7 (3.3)         | 207 (96.7)                    | 0 (.0) | 1.508    | .470     |
|                                                           | 22-39                                                                  | 21 (5.3)        | 378 (94.7)                    | 0 (.0) |          |          |
|                                                           | ≥ 40                                                                   | 17 (5.4)        | 298 (94.6)                    | 0 (.0) |          |          |
| <b>Gender</b>                                             |                                                                        |                 |                               |        |          |          |
|                                                           | Male                                                                   | 17 (5.7)        | 283 (94.3)                    | 0 (.0) | .651     | .420     |
|                                                           | Female                                                                 | 28 (4.5)        | 601 (95.5)                    | 0 (.0) |          |          |
| <b>Place of origin</b>                                    |                                                                        |                 |                               |        |          |          |
|                                                           | Rural area                                                             | 23 (3.9)        | 569 (96.1)                    | 0 (.0) | 1.116    | .291     |
|                                                           | Urban area                                                             | 32 (5.4)        | 560 (94.6)                    | 0 (.0) |          |          |
| <b>Education</b>                                          |                                                                        |                 |                               |        |          |          |
|                                                           | Less than college or university                                        | 9 (6.9)         | 121 (93.1)                    | 0 (.0) | 1.418    | .234     |
|                                                           | College or university                                                  | 36 (4.5)        | 763 (95.5)                    | 0 (.0) |          |          |
| <b>Autonomy level</b>                                     |                                                                        |                 |                               |        |          |          |
|                                                           | Alone                                                                  | 40 (5.0)        | 758 (95.0)                    | 0 (.0) | .349     | .555     |
|                                                           | Family/profesional/other support                                       | 5 (3.8)         | 126 (96.2)                    | 0 (.0) |          |          |
| <b>Marital status</b>                                     |                                                                        |                 |                               |        |          |          |
|                                                           | Single                                                                 | 26 (5.7)        | 431 (94.3)                    | 0 (.0) | .910     | .635     |
|                                                           | Married or in union                                                    | 16 (4.2)        | 361 (95.8)                    | 0 (.0) |          |          |
|                                                           | Widowed/separated/divorced                                             | 2 (5.4)         | 35 (94.6)                     | 0 (.0) |          |          |
| <b>Living arrangements</b>                                |                                                                        |                 |                               |        |          |          |
|                                                           | Living alone/with children/with grandchildren                          | 5 (4.6)         | 103 (95.4)                    | 0 (.0) | 1.232    | .745     |
|                                                           | Living with a partner/with a partner and children and/or grandchildren | 19 (5.5)        | 326 (94.5)                    | 0 (.0) |          |          |
|                                                           | Living with parents and/or grandparents/with other relatives           | 15 (5.1)        | 282 (94.9)                    | 0 (.0) |          |          |
|                                                           | Living with friends/other types                                        | 6 (3.4)         | 173 (96.6)                    | 0 (.0) |          |          |
| <b>Employment situation</b>                               |                                                                        |                 |                               |        |          |          |
|                                                           | Unemployed/retired                                                     | 27 (5.4)        | 469 (94.6)                    | 0 (.0) | .830     | .362     |
|                                                           | Employed                                                               | 18 (4.2)        | 415 (95.8)                    | 0 (.0) |          |          |
| <b>Income level (€/month)</b>                             |                                                                        |                 |                               |        |          |          |
|                                                           | > 2001                                                                 | 28 (5.2)        | 506 (94.8)                    | 0 (.0) | .435     | .804     |
|                                                           | 1001-2000                                                              | 10 (4.3)        | 223 (95.7)                    | 0 (.0) |          |          |
|                                                           | < 1000                                                                 | 7 (4.3)         | 155 (95.7)                    | 0 (.0) |          |          |

NOTE: N=Number of participants,  $\chi^2$ =Chi-square test, *p*=significance,  $\alpha$ -Risk=.05



**Table S3-6.** Association between the social support (Count on other people who inform and help you) and the sociodemographic characteristics of the participants.

| Count on other people who inform and help you |                                                                        | Frequency N (%) |                            |        | $\chi^2$ | <i>p</i> |
|-----------------------------------------------|------------------------------------------------------------------------|-----------------|----------------------------|--------|----------|----------|
|                                               |                                                                        | Disagree        | Neither agree nor disagree | Agree  |          |          |
| <b>Age (years)</b>                            |                                                                        |                 |                            |        |          |          |
|                                               | < 22                                                                   | 13 (6.1)        | 201 (93.9)                 | 0 (.0) | .249     | .883     |
|                                               | 22-39                                                                  | 25 (6.3)        | 374 (93.7)                 | 0 (.0) |          |          |
|                                               | ≥ 40                                                                   | 17 (5.4)        | 298 (94.6)                 | 0 (.0) |          |          |
| <b>Gender</b>                                 |                                                                        |                 |                            |        |          |          |
|                                               | Male                                                                   | 17 (5.7)        | 283 (94.3)                 | 0 (.0) | .102     | .749     |
|                                               | Female                                                                 | 39 (6.2)        | 590 (93.8)                 | 0 (.0) |          |          |
| <b>Place of origin</b>                        |                                                                        |                 |                            |        |          |          |
|                                               | Rural area                                                             | 32 (5.0)        | 560 (95.0)                 | 0 (.0) | .903     | .342     |
|                                               | Urban area                                                             | 39 (6.6)        | 553 (93.4)                 | 0 (.0) |          |          |
| <b>Education</b>                              |                                                                        |                 |                            |        |          |          |
|                                               | Less than college or university                                        | 11 (8.5)        | 119 (91.5)                 | 0 (.0) | 1.580    | .209     |
|                                               | College or university                                                  | 45 (5.6)        | 754 (94.4)                 | 0 (.0) |          |          |
| <b>Autonomy level</b>                         |                                                                        |                 |                            |        |          |          |
|                                               | Alone                                                                  | 5 (6.1)         | 126 (93.9)                 | 0 (.0) | .126     | .722     |
|                                               | Family/profesional/other support                                       | 7 (5.3)         | 124 (94.7)                 | 0 (.0) |          |          |
| <b>Marital status</b>                         |                                                                        |                 |                            |        |          |          |
|                                               | Single                                                                 | 34 (7.4)        | 423 (92.6)                 | 0 (.0) | 2.159    | .340     |
|                                               | Married or in union                                                    | 19 (5.0)        | 358 (95.0)                 | 0 (.0) |          |          |
|                                               | Widowed/separated/divorced                                             | 3 (8.1)         | 34 (91.9)                  | 0 (.0) |          |          |
| <b>Living arrangements</b>                    |                                                                        |                 |                            |        |          |          |
|                                               | Living alone/with children/with grandchildren                          | 7 (6.5)         | 101 (93.5)                 | 0 (.0) | .652     | .884     |
|                                               | Living with a partner/with a partner and children and/or grandchildren | 23 (6.7)        | 322 (93.3)                 | 0 (.0) |          |          |
|                                               | Living with parents and/or grandparents/with other relatives           | 17 (5.7)        | 280 (94.3)                 | 0 (.0) |          |          |
|                                               | Living with friends/other types                                        | 9 (5.0)         | 170 (95.0)                 | 0 (.0) |          |          |
| <b>Employment situation</b>                   |                                                                        |                 |                            |        |          |          |
|                                               | Unemployed/retired                                                     | 35 (7.1)        | 461 (92.9)                 | 0 (.0) | 1.987    | .159     |
|                                               | Employed                                                               | 21 (4.8)        | 412 (95.2)                 | 0 (.0) |          |          |
| <b>Income level (€/month)</b>                 |                                                                        |                 |                            |        |          |          |
|                                               | > 2001                                                                 | 34 (6.4)        | 500 (93.6)                 | 0 (.0) | .255     | .880     |
|                                               | 1001-2000                                                              | 13 (5.6)        | 220 (94.4)                 | 0 (.0) |          |          |
|                                               | < 1000                                                                 | 9 (5.6)         | 153 (94.4)                 | 0 (.0) |          |          |

NOTE: N=Number of participants,  $\chi^2$ =Chi-square test, *p*=significance,  $\alpha$ -Risk=.05

**Table S3-7.** Association between the social support (Feel valued and appreciated by the people around you) and the sociodemographic characteristics of the participants.

| Feel valued and appreciated by the people around you |                                                                        | Frequency N (%) |                            |        | $\chi^2$ | <i>p</i> |
|------------------------------------------------------|------------------------------------------------------------------------|-----------------|----------------------------|--------|----------|----------|
|                                                      |                                                                        | Disagree        | Neither agree nor disagree | Agree  |          |          |
| <b>Age (years)</b>                                   |                                                                        |                 |                            |        |          |          |
|                                                      | < 22                                                                   | 11 (5.1)        | 203 (94.9)                 | 0 (.0) | 3.451    | .178     |
|                                                      | 22-39                                                                  | 17 (4.3)        | 382 (95.7)                 | 0 (.0) |          |          |
|                                                      | ≥ 40                                                                   | 7 (2.2)         | 308 (97.8)                 | 0 (.0) |          |          |
| <b>Gender</b>                                        |                                                                        |                 |                            |        |          |          |
|                                                      | Male                                                                   | 11 (3.7)        | 289 (96.3)                 | 0 (.0) | .052     | .820     |
|                                                      | Female                                                                 | 25 (4.0)        | 604 (96.0)                 | 0 (.0) |          |          |
| <b>Place of origin</b>                               |                                                                        |                 |                            |        |          |          |
|                                                      | Rural area                                                             | 13 (3.9)        | 324 (96.1)                 | 0 (.0) | .000     | .983     |
|                                                      | Urban area                                                             | 23 (3.9)        | 569 (96.1)                 | 0 (.0) |          |          |
| <b>Education</b>                                     |                                                                        |                 |                            |        |          |          |
|                                                      | Less than college or university                                        | 12 (9.2)        | 118 (90.8)                 | 0 (.0) | 11.639   | .001     |
|                                                      | College or university                                                  | 24 (3.0)        | 775 (97.0)                 | 0 (.0) |          |          |
| <b>Autonomy level</b>                                |                                                                        |                 |                            |        |          |          |
|                                                      | Alone                                                                  | 30 (3.8)        | 768 (96.2)                 | 0 (.0) | .203     | .652     |
|                                                      | Family/profesional/other support                                       | 6 (4.6)         | 125 (95.4)                 | 0 (.0) |          |          |
| <b>Marital status</b>                                |                                                                        |                 |                            |        |          |          |
|                                                      | Single                                                                 | 25 (5.5)        | 432 (94.5)                 | 0 (.0) | 8.670    | .013     |
|                                                      | Married or in union                                                    | 7 (1.9)         | 370 (98.1)                 | 0 (.0) |          |          |
|                                                      | Widowed/separated/divorced                                             | 3 (8.1)         | 34 (91.9)                  | 0 (.0) |          |          |
| <b>Living arrangements</b>                           |                                                                        |                 |                            |        |          |          |
|                                                      | Living alone/with children/with grandchildren                          | 4 (3.7)         | 104 (96.3)                 | 0 (.0) | 2.765    | .429     |
|                                                      | Living with a partner/with a partner and children and/or grandchildren | 9 (2.6)         | 336 (97.4)                 | 0 (.0) |          |          |
|                                                      | Living with parents and/or grandparents/with other relatives           | 15 (5.1)        | 282 (94.9)                 | 0 (.0) |          |          |
|                                                      | Living with friends/other types                                        | 8 (4.5)         | 171 (95.5)                 | 0 (.0) |          |          |
| <b>Employment situation</b>                          |                                                                        |                 |                            |        |          |          |
|                                                      | Unemployed/retired                                                     | 23 (4.6)        | 473 (95.4)                 | 0 (.0) | 1.659    | .198     |
|                                                      | Employed                                                               | 13 (3.0)        | 420 (97.0)                 | 0 (.0) |          |          |
| <b>Income level (€/month)</b>                        |                                                                        |                 |                            |        |          |          |
|                                                      | > 2001                                                                 | 28 (5.2)        | 506 (94.8)                 | 0 (.0) | 6.335    | .042     |
|                                                      | 1001-2000                                                              | 5 (2.1)         | 228 (97.9)                 | 0 (.0) |          |          |
|                                                      | < 1000                                                                 | 3 (1.9)         | 159 (98.1)                 | 0 (.0) |          |          |

NOTE: N=Number of participants,  $\chi^2$ =Chi-square test, *p*=significance,  $\alpha$ -Risk=.05

**Table-S4.** Cross table of age and gender, in four age groups, for the sample description.

|           |       | GENDER             |        | Total  |
|-----------|-------|--------------------|--------|--------|
|           |       | Male               | Female |        |
| Age range | 18-29 | Count              | 291    | 798    |
|           |       | Expected count     | 328,5  | 760,5  |
|           |       | % within age range | 26,7%  | 73,3%  |
|           |       | % within gender    | 49,2%  | 58,3%  |
|           |       | % of the total     | 14,9%  | 40,7%  |
|           | 30-49 | Count              | 143    | 325    |
|           |       | Expected count     | 141,2  | 326,8  |
|           |       | % within age range | 30,6%  | 69,4%  |
|           |       | % within gender    | 24,2%  | 23,8%  |
|           |       | % of the total     | 7,3%   | 16,6%  |
|           | 50-64 | Count              | 105    | 184    |
|           |       | Expected count     | 87,2   | 201,8  |
|           |       | % within age range | 36,3%  | 63,7%  |
|           |       | % within gender    | 17,8%  | 13,5%  |
|           |       | % of the total     | 5,4%   | 9,4%   |
|           | >65   | Count              | 52     | 61     |
|           |       | Expected count     | 34,1   | 78,9   |
|           |       | % within age range | 46,0%  | 54,0%  |
|           |       | % within gender    | 8,8%   | 4,5%   |
|           |       | % of the total     | 2,7%   | 3,1%   |
| Total     |       | Count              | 591    | 1368   |
|           |       | Expected count     | 591,0  | 1368,0 |
|           |       | % within age range | 30,2%  | 69,8%  |
|           |       | % within gender    | 100,0% | 100,0% |
|           |       | % of the total     | 30,2%  | 69,8%  |

**PRESENTACIÓN Y CONFIDENCIALIDAD****PRESENTACIÓN**

Se trata de una investigación cuyo objetivo es estudiar las **ACTIVIDADES CONJUNTAS REALIZADAS POR MIEMBROS DE DISTINTAS GENERACIONES**, para el diseño de pautas precisas de intervención que mejoren su bienestar y calidad de vida.

Para ello solicitamos su valiosa colaboración en la siguiente encuesta.

No existen respuestas correctas o incorrectas, sólo situaciones habituales diferentes. La mejor respuesta es la que refleje honestamente su realidad y punto de vista.

**COMPROMISO DE CONFIDENCIALIDAD Y ANONIMATO**

Sus respuestas son totalmente confidenciales y sólo tratadas a efectos estadísticos globales, de acuerdo con las normas éticas y deontológicas aplicables a toda investigación científica.

Esta encuesta es anónima, por lo que en ningún caso será posible su identificación a través de los datos que proporcione.

**AGRADECIMIENTO**

Le agradecemos su generosa y necesaria colaboración sin la cual no sería posible realizar esta investigación.

**RECONOCIMIENTO**

Se trata de una investigación pre-doctoral financiada por la JCyL (EDU/1083/2013) y la Unión Europea (FEDER 2014-2020) a A. Canedo, dentro del Grupo de Investigación de Excelencia (JCyL, GREX259, Dir JN García) cuyo objetivo es estudiar las **ACTIVIDADES CONJUNTAS REALIZADAS POR MIEMBROS DE DISTINTAS GENERACIONES**, para el diseño de pautas precisas de intervención que mejoren el bienestar de los participantes.

## CONSENTIMIENTO INFORMADO

Si acepta colaborar en esta investigación, marque la opción "Acepto colaborar voluntariamente en el estudio" y complete la encuesta confidencial y anónima.

Para avanzar pulse **SIGUIENTE**.

En todo momento puede retroceder en la encuesta y modificar sus respuestas. Para ello, debe pulsar **ANTERIOR**.

Cuando haya concluido sus respuestas, pulse **FINALIZAR Y ENVIAR**.

### 1. ACEPTACIÓN DE COLABORACIÓN

- ☐ Acepto colaborar voluntariamente en el estudio
- ☐ No acepto colaborar en el estudio

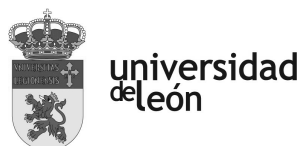

## Acción Conjunta Intergeneracional (ACIG)

### DATOS DEMOGRÁFICOS (DDM)

#### 2. Indique la fecha de nacimiento de su

MADRE

| DD                   | MM                   | AAAA                 |
|----------------------|----------------------|----------------------|
| <input type="text"/> | <input type="text"/> | <input type="text"/> |

#### 3. Indique la fecha de nacimiento de su

PADRE

| DD                   | MM                   | AAAA                 |
|----------------------|----------------------|----------------------|
| <input type="text"/> | <input type="text"/> | <input type="text"/> |

#### 4. Género

- ☐ Hombre
- ☐ Mujer

#### 5. Fecha de nacimiento

Día / Mes / Año

| DD                   | MM                   | AAAA                 |
|----------------------|----------------------|----------------------|
| <input type="text"/> | <input type="text"/> | <input type="text"/> |

## 6. Edad

## 7. Nacionalidad

- ☐ Española
- ☐ Extranjera
- ☐ Española y otra

## 8. Lugar de procedencia

- ☐ Zona rural pueblo pequeño
- ☐ Zona rural pueblo grande
- ☐ Zona urbana ciudad pequeña
- ☐ Zona urbana ciudad grande

## 9. Núcleo poblacional de residencia

- ☐ Localidad de menos de 250 habitantes
- ☐ Localidad de 250-2000 habitantes
- ☐ Localidad de 2001-50.000 habitantes
- ☐ Localidad de 50.001-300.000 habitantes
- ☐ Localidad de más de 300.000 habitantes

## 10. Estado Civil

- ☐ No procede
- ☐ Soltero/a
- ☐ Casado/a o en pareja
- ☐ Viudo/a
- ☐ Separado/a
- ☐ Divorciado/a

## 11. ¿Dónde vive actualmente?

- ☐ En mi casa
- ☐ En casa de un familiar
- ☐ En casa de un amigo/a
- ☐ En un centro o residencia

12. ¿Con quién vive actualmente?

- ☐ Solo
- ☐ En pareja
- ☐ En pareja con hijos
- ☐ En pareja con nietos
- ☐ En pareja con hijos y nietos
- ☐ Con mis hijos
- ☐ Con mis nietos
- ☐ Con hijos y nietos
- ☐ Con mis padres
- ☐ Con mis abuelos
- ☐ Con mis padres y abuelos
- ☐ Con otros familiares
- ☐ Con amigos
- ☐ Otro (especifique)

13. ¿Qué nivel de estudios ha alcanzado?

- ☐ Estudios Primarios
- ☐ Estudios Secundarios
- ☐ Estudios Profesionales
- ☐ Estudios Universitarios

14. Autonomía Personal

|                                                         | Solo/a                | Con ayuda de un familiar/es | Con ayuda de un profesional/es | Con ayuda de otra persona/as |
|---------------------------------------------------------|-----------------------|-----------------------------|--------------------------------|------------------------------|
| Habitualmente realizo las actividades de la vida diaria | <input type="radio"/> | <input type="radio"/>       | <input type="radio"/>          | <input type="radio"/>        |

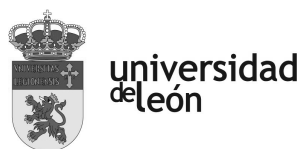

Acción Conjunta Intergeneracional (ACIG)

**Actividad Laboral (DDM)**

15. En relación con la actividad laboral, ¿en qué situación se encuentra?

- ☐ En desempleo
- ☐ Trabajando
- ☐ Percibiendo una pensión (contributiva o no contributiva)

Acción Conjunta Intergeneracional (ACIG)

**Desempleo (DDM)**

16. En relación a su situación de desempleo, se encuentra:

- ☐ Percibiendo la prestación por desempleo
- ☐ Cobrando la ayuda familiar
- ☐ No percibo ingresos fijos
- ☐ Otro (especifique)

Acción Conjunta Intergeneracional (ACIG)

**Pensión (DDM)**

17. Percibo una pensión por:

- ☐ Jubilación (ordinaria, anticipada, parcial, flexible, especial)
- ☐ Incapacidad permanente (total, absoluta o gran invalidez)
- ☐ Fallecimiento (viudedad, orfandad o en favor de familiares)
- ☐ Invalidez

Acción Conjunta Intergeneracional (ACIG)

**Ocupación (DDM)**



18. ¿Cuál es su ocupación actual o lo era antes del desempleo o la jubilación?

- ☐ Educación
- ☐ Sanidad
- ☐ Administración y Servicios
- ☐ Industria y Construcción
- ☐ Alimentación y Medio Natural
- ☐ Estudiante
- ☐ Otro (especifique)

19. Ejerce o ejercía dicha ocupación como:

- ☐ Empleador
- ☐ Empresario sin asalariados o trabajador independiente
- ☐ Miembro de una cooperativa
- ☐ Asalariado del sector público
- ☐ Asalariado del sector privado
- ☐ No compete

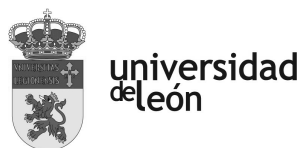

Acción Conjunta Intergeneracional (ACIG)

**Ingresos (DDM)**

20. Aproximadamente, ¿qué ingresos recibe al mes?

- ☐ Más de 2500 euros/mes
- ☐ Entre 2001-2500 euros/mes
- ☐ Entre 1501-2000 euros/mes
- ☐ Entre 1001-1500 euros/mes
- ☐ Entre 501-1000 euros/mes
- ☐ Menos de 500 euros/mes

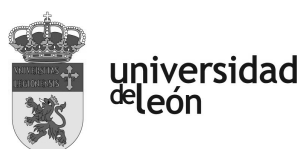

Acción Conjunta Intergeneracional (ACIG)

## Asociación (DDM)

21. ¿Pertenece a alguna asociación de afectados?

- ☐ Sí
- ☐ No



## Acción Conjunta Intergeneracional (ACIG)

### Tipo de Asociación (DDM)

22. Señale el tipo de asociación de afectados a la que pertenece:

- ☐ Discapacidad visual
- ☐ Discapacidad auditiva
- ☐ Discapacidad psíquica
- ☐ Discapacidad motórica
- ☐ Trastornos de aprendizaje
- ☐ Trastornos de conducta
- ☐ Trastornos de la comunicación
- ☐ Trastornos del espectro autista (TEA)
- ☐ Trastorno por déficit de atención con hiperactividad (TDAH)
- ☐ Otro (especifique)

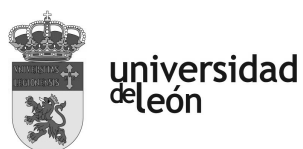

## Acción Conjunta Intergeneracional (ACIG)

### APOYO SOCIAL PERCIBIDO (ASP)

#### Apoyo Instrumental (ASP)

23. Indique si recibe algún tipo de APOYO INSTRUMENTAL relacionado con su cuidado personal (aseo, seguimiento de dietas), desplazamiento y/o movilidad, la realización de las tareas del hogar, trámites y/o gestiones administrativas...

☐ Sí

☐ No

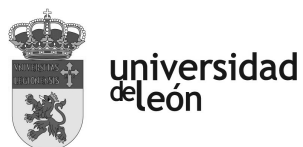

## Acción Conjunta Intergeneracional (ACIG)

### QUIÉNES - Apoyo Instrumental (ASP)

24. Señale por parte de QUIÉNES recibe dicho apoyo instrumental y el grado de satisfacción que ello le produce

|                                                               | Nada satisfecho       | Poco satisfecho       | Algo satisfecho       | Bastante satisfecho   | Muy satisfecho        |
|---------------------------------------------------------------|-----------------------|-----------------------|-----------------------|-----------------------|-----------------------|
| Mi pareja                                                     | <input type="radio"/> |
| Mis hijos                                                     | <input type="radio"/> |
| Mis nietos                                                    | <input type="radio"/> |
| Mis padres                                                    | <input type="radio"/> |
| Mis abuelos                                                   | <input type="radio"/> |
| Mis hermanos                                                  | <input type="radio"/> |
| Otros miembros de mi familia                                  | <input type="radio"/> |
| Mis amistades                                                 | <input type="radio"/> |
| Mis vecinos, conocidos, compañeros de trabajo                 | <input type="radio"/> |
| Asociaciones, organizaciones o personas en mi misma situación | <input type="radio"/> |
| Servicios de salud, sociales y sus profesionales              | <input type="radio"/> |
| La escuela y sus profesionales                                | <input type="radio"/> |
| Instituciones religiosas y sus miembros                       | <input type="radio"/> |

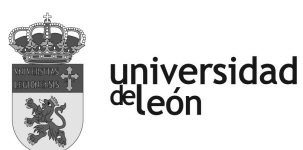

## Acción Conjunta Intergeneracional (ACIG)

## APOYO SOCIAL PERCIBIDO (ASP)

### Apoyo Emocional (ASP)

25. Indique si recibe algún tipo de APOYO EMOCIONAL expresado por la vía del cariño, la confianza, la escucha, la empatía, la transmisión física de afectos, el acompañamiento, sentimientos de complicidad, de preocupación por su vida personal y/o familiar...

☐ Sí

☐ No

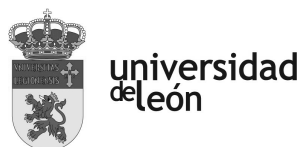

## Acción Conjunta Intergeneracional (ACIG)

### QUIÉNES - Apoyo Emocional (ASP)

26. Señale por parte de QUIÉNES recibe dicho apoyo emocional y el grado de satisfacción que ello le produce

|                                                               | Nada satisfecho       | Poco satisfecho       | Algo satisfecho       | Bastante satisfecho   | Muy satisfecho        |
|---------------------------------------------------------------|-----------------------|-----------------------|-----------------------|-----------------------|-----------------------|
| Mi pareja                                                     | <input type="radio"/> |
| Mis hijos                                                     | <input type="radio"/> |
| Mis nietos                                                    | <input type="radio"/> |
| Mis padres                                                    | <input type="radio"/> |
| Mis abuelos                                                   | <input type="radio"/> |
| Mis hermanos                                                  | <input type="radio"/> |
| Otros miembros de mi familia                                  | <input type="radio"/> |
| Mis amistades                                                 | <input type="radio"/> |
| Mis vecinos, conocidos, compañeros de trabajo                 | <input type="radio"/> |
| Asociaciones, organizaciones o personas en mi misma situación | <input type="radio"/> |
| Servicios de salud, sociales y sus profesionales              | <input type="radio"/> |
| La escuela y sus profesionales                                | <input type="radio"/> |
| Instituciones religiosas y sus miembros                       | <input type="radio"/> |

82. SATISFACCIÓN que le produce utilizar junto con estas personas herramientas educativas virtuales, de ofimática, y sitios web:

|                                                                        | Nada satisfecho       | Poco satisfecho       | Algo satisfecho       | Bastante satisfecho   | Muy satisfecho        |
|------------------------------------------------------------------------|-----------------------|-----------------------|-----------------------|-----------------------|-----------------------|
| Mi pareja                                                              | <input type="radio"/> |
| Mi hijo/a                                                              | <input type="radio"/> |
| Mi nieto/a                                                             | <input type="radio"/> |
| Mi padre/madre                                                         | <input type="radio"/> |
| Mi abuelo/a                                                            | <input type="radio"/> |
| Mi hermano/a                                                           | <input type="radio"/> |
| Otro miembro de mi familia                                             | <input type="radio"/> |
| Un amigo/a                                                             | <input type="radio"/> |
| Un vecino/a, conocido/a                                                | <input type="radio"/> |
| Un colega o compañero/a de trabajo                                     | <input type="radio"/> |
| Una persona en mi misma situación (problemática)                       | <input type="radio"/> |
| Persona / profesional de una asociación /organización / institución    | <input type="radio"/> |
| Persona / Profesional de los servicios de salud, sociales o educativos | <input type="radio"/> |

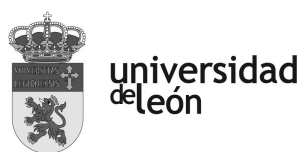

Acción Conjunta Intergeneracional (ACIG)

## PERFILES PSICOLÓGICOS (PEP)

### EMOCIONES (PEP-IE)

□

83. Indique la frecuencia con que...

|                                                                                          | Nunca o casi<br>nunca | De vez en<br>cuando   | A veces               | Normalmente           | Bastante a<br>menudo  | Muchas<br>veces       | Siempre               |
|------------------------------------------------------------------------------------------|-----------------------|-----------------------|-----------------------|-----------------------|-----------------------|-----------------------|-----------------------|
| Sabe identificar lo que siente                                                           | <input type="radio"/> |
| Sabe reconocer lo que sienten los demás por sus gustos, su voz                           | <input type="radio"/> |
| Expresa sus sentimientos abiertamente                                                    | <input type="radio"/> |
| Controla sus emociones y hace que estas no afecten a sus pensamientos o formas de actuar | <input type="radio"/> |
| Empatiza con lo que le ha sucedido o esta sucediendo a otra persona                      | <input type="radio"/> |
| Sabe decir "no" cuando sabe que algo no le conviene                                      | <input type="radio"/> |
| En general, ¿está usted satisfecho/a de sí mismo/a?                                      | <input type="radio"/> |

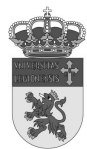

universidad  
de león

### Acción Conjunta Intergeneracional (ACIG)

#### MOTIVACIÓN (PEP-MOT)

84. Indique la frecuencia con que...

|                                                                             | Nunca o casi<br>nunca | De vez en<br>cuando   | A veces               | Normalmente           | Bastante a<br>menudo  | Muchas<br>veces       | Siempre               |
|-----------------------------------------------------------------------------|-----------------------|-----------------------|-----------------------|-----------------------|-----------------------|-----------------------|-----------------------|
| Persiste usted hasta conseguir sus objetivos                                | <input type="radio"/> |
| Hace las cosas por la satisfacción que le reporta conseguir las             | <input type="radio"/> |
| ¿Hace las cosas para obtener el reconocimiento y/o aprobación de los demás? | <input type="radio"/> |

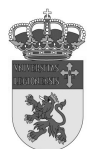

universidad  
de león

**ATRIBUCIONES (PEP-ATR)**

85. Cuando consigue alcanzar sus metas, habitualmente piensa que se debe a...

- ☐ Su esfuerzo
- ☐ Su capacidad o talento
- ☐ Su buena suerte
- ☐ La facilidad de la tarea

86. Cuando no consigue alcanzar sus metas, habitualmente piensa que se debe a...

- ☐ Su falta de esfuerzo
- ☐ Su escasa capacidad o talento
- ☐ Su mala suerte
- ☐ La excesiva dificultad de la tarea

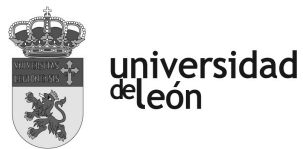

**AUTOEFICACIA (PEP-AE)**

87. ¿En qué medida se siente capaz de ser autónomo e independiente para llevar a cabo las siguientes actividades?

|                                                                 | No soy capaz          | Poco seguro de poder hacerlo | Ni seguro ni inseguro de poder hacerlo | Bastante seguro de poder hacerlo | Totalmente seguro de poder hacerlo |
|-----------------------------------------------------------------|-----------------------|------------------------------|----------------------------------------|----------------------------------|------------------------------------|
| Cuidado personal                                                | <input type="radio"/> | <input type="radio"/>        | <input type="radio"/>                  | <input type="radio"/>            | <input type="radio"/>              |
| Ejercicio físico                                                | <input type="radio"/> | <input type="radio"/>        | <input type="radio"/>                  | <input type="radio"/>            | <input type="radio"/>              |
| Actividades para mantener activa su mente o mejorar su memoria  | <input type="radio"/> | <input type="radio"/>        | <input type="radio"/>                  | <input type="radio"/>            | <input type="radio"/>              |
| Tareas del hogar                                                | <input type="radio"/> | <input type="radio"/>        | <input type="radio"/>                  | <input type="radio"/>            | <input type="radio"/>              |
| Actividades cotidianas en la calle                              | <input type="radio"/> | <input type="radio"/>        | <input type="radio"/>                  | <input type="radio"/>            | <input type="radio"/>              |
| Relacionarse con otras personas                                 | <input type="radio"/> | <input type="radio"/>        | <input type="radio"/>                  | <input type="radio"/>            | <input type="radio"/>              |
| Participar en actividades formativas                            | <input type="radio"/> | <input type="radio"/>        | <input type="radio"/>                  | <input type="radio"/>            | <input type="radio"/>              |
| Participar en actividades para ocupar su tiempo libre o de ocio | <input type="radio"/> | <input type="radio"/>        | <input type="radio"/>                  | <input type="radio"/>            | <input type="radio"/>              |
| Administrar su dinero                                           | <input type="radio"/> | <input type="radio"/>        | <input type="radio"/>                  | <input type="radio"/>            | <input type="radio"/>              |

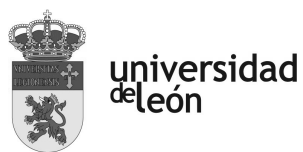

Acción Conjunta Intergeneracional (ACIG)

**SOCIAL (PEP-DS)**



88. Indique en qué medida está de acuerdo con las siguientes afirmaciones:

|                                                                                                                       | Totalmente en<br>desacuerdo | Más bien en<br>desacuerdo | Ni de acuerdo, ni<br>en desacuerdo | Más bien de<br>acuerdo | Totalmente de<br>acuerdo |
|-----------------------------------------------------------------------------------------------------------------------|-----------------------------|---------------------------|------------------------------------|------------------------|--------------------------|
| Tengo un círculo social<br>amplio                                                                                     | <input type="radio"/>       | <input type="radio"/>     | <input type="radio"/>              | <input type="radio"/>  | <input type="radio"/>    |
| Tengo buenas<br>habilidades sociales y<br>comunicativas                                                               | <input type="radio"/>       | <input type="radio"/>     | <input type="radio"/>              | <input type="radio"/>  | <input type="radio"/>    |
| Me siento sólo                                                                                                        | <input type="radio"/>       | <input type="radio"/>     | <input type="radio"/>              | <input type="radio"/>  | <input type="radio"/>    |
| Puedo contar con<br>personas que me<br>reconfortan y animan                                                           | <input type="radio"/>       | <input type="radio"/>     | <input type="radio"/>              | <input type="radio"/>  | <input type="radio"/>    |
| Tengo el apoyo de<br>personas para<br>cualquier gestión que<br>tenga que realizar                                     | <input type="radio"/>       | <input type="radio"/>     | <input type="radio"/>              | <input type="radio"/>  | <input type="radio"/>    |
| Cuento con personas<br>que me informan y<br>ayudan ante<br>situaciones o asuntos<br>que escapan a mi<br>entendimiento | <input type="radio"/>       | <input type="radio"/>     | <input type="radio"/>              | <input type="radio"/>  | <input type="radio"/>    |
| Me siento valorado/a y<br>apreciado/a por las<br>personas que me<br>rodean                                            | <input type="radio"/>       | <input type="radio"/>     | <input type="radio"/>              | <input type="radio"/>  | <input type="radio"/>    |



Acción Conjunta Intergeneracional (ACIG)

HA COMPLETADO LA ENCUESTA

Gracias por su colaboración y contribución a la presente investigación
